# Supplementary material for: Molecular diversity of the three-component reaction of α-amino acids, dialkyl acetylenedicarboxylates and N-substituted maleimides
Source: Royal Society of Chemistry journal article supplement (doi:10.1039/c6ob00921b), 2016-01-01

**Molecular diversity of three-component reaction of  $\alpha$ -amino acids, dialkyl  
acetylenedicarboxylates and N-substituted maleimides**

**Liang Chen, Jing Sun\*, Ju Xie, Chao-Guo Yan\***

**Supporting Information**

|                                                                                                  |             |
|--------------------------------------------------------------------------------------------------|-------------|
| <b>Figures of single crystal structures</b>                                                      | <b>2-4</b>  |
| <b><math>^1\text{H}</math> and <math>^{13}\text{C}</math> NMR, HRMS spectra of the compounds</b> | <b>5-43</b> |

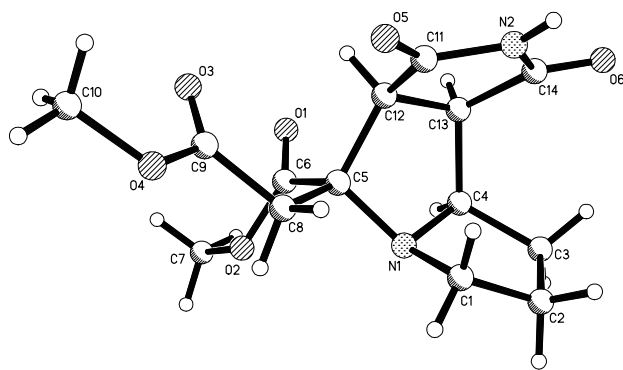

Fig. s1 ORTEP-drawing of the crystal structure of **1a**

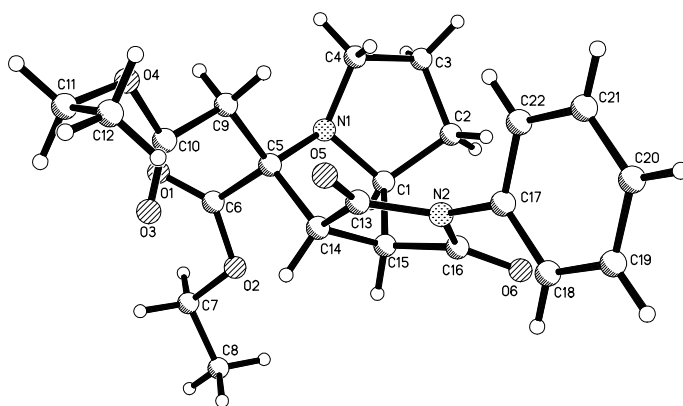

Fig. s2 ORTEP-drawing of the crystal structure of **1g**

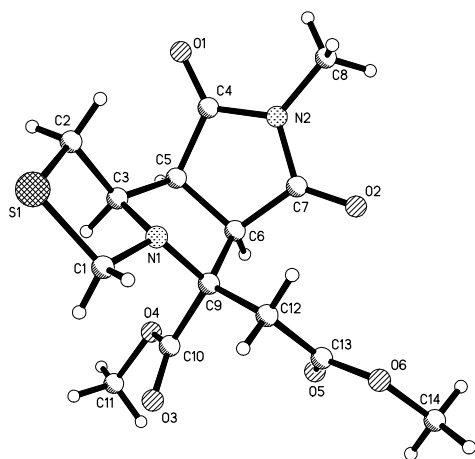

Fig. s3 ORTEP-drawing of the crystal structure of **2b**

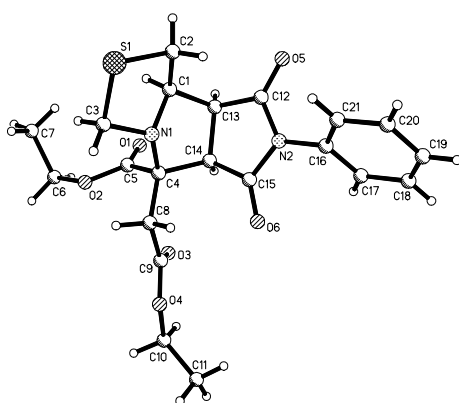

Fig. s4 ORTEP-drawing of the crystal structure of **2g**

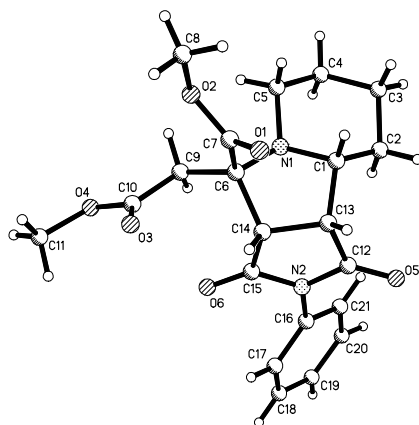

Fig. s5 ORTEP-drawing of the crystal structure of **3a**

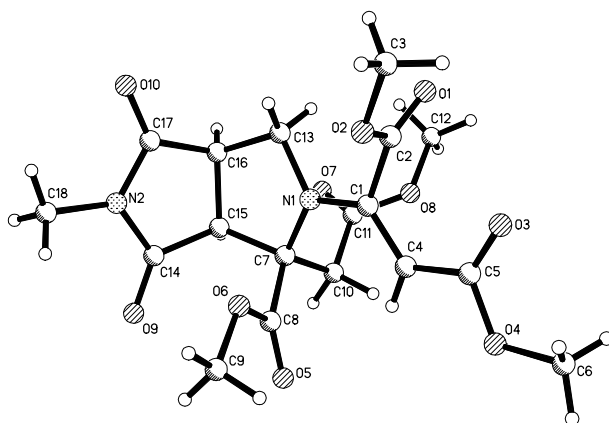

Fig. s6 ORTEP-drawing of the crystal structure of **4a**

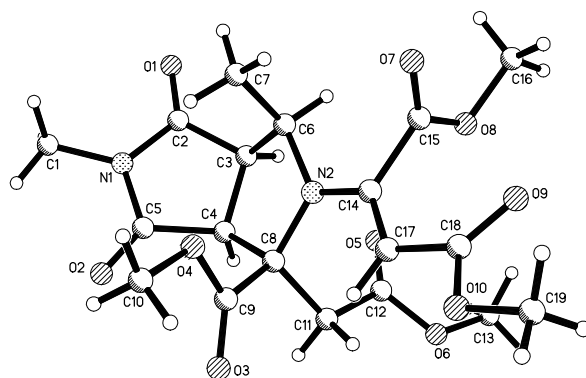

Fig. s7 ORTEP-drawing of the crystal structure of **4d**

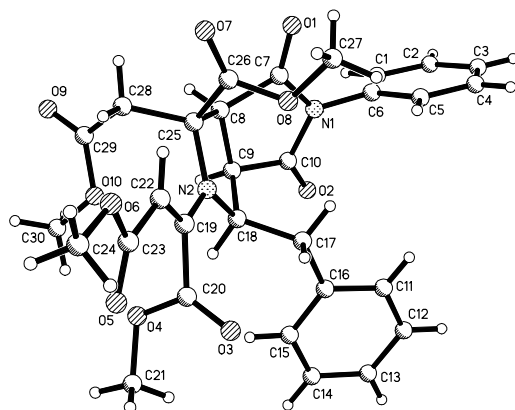

Fig. s8 ORTEP-drawing of the crystal structure of **4k**

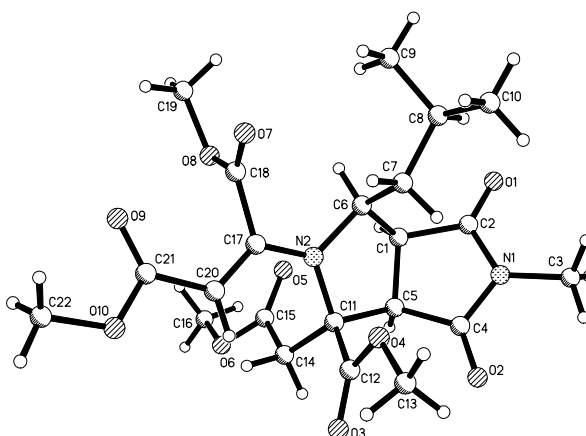

Fig. s9 ORTEP-drawing of the crystal structure of **4m**

**Methyl 4-(2-methoxy-2-oxoethyl)-1,3-dioxodecahydropyrrolo[3,4-a]pyrrolizine-4-carboxylate (1a):**

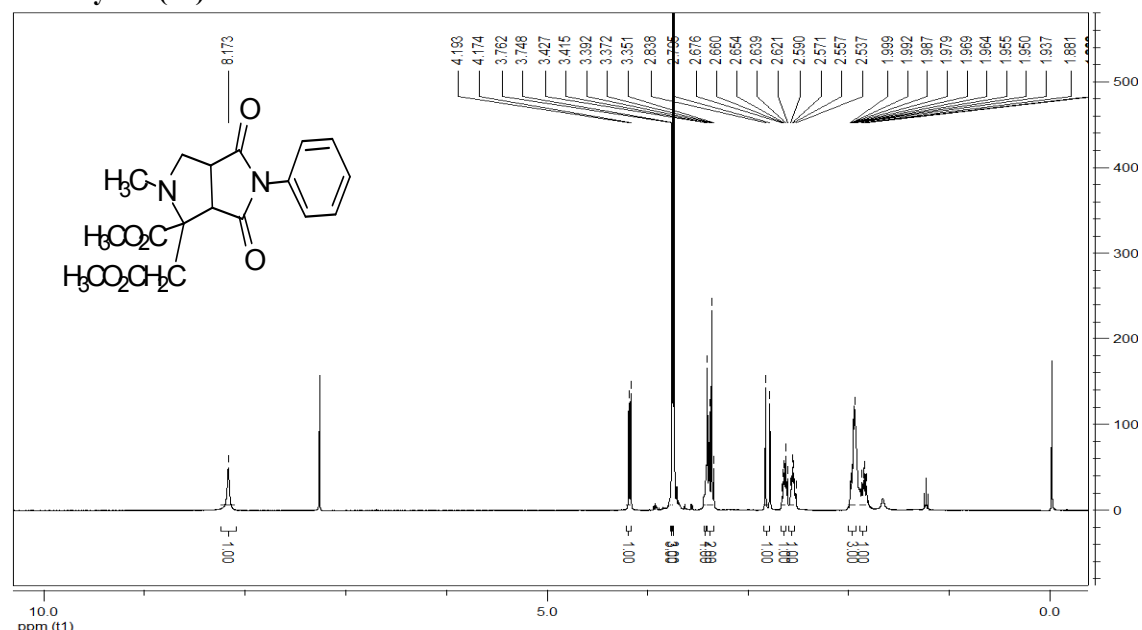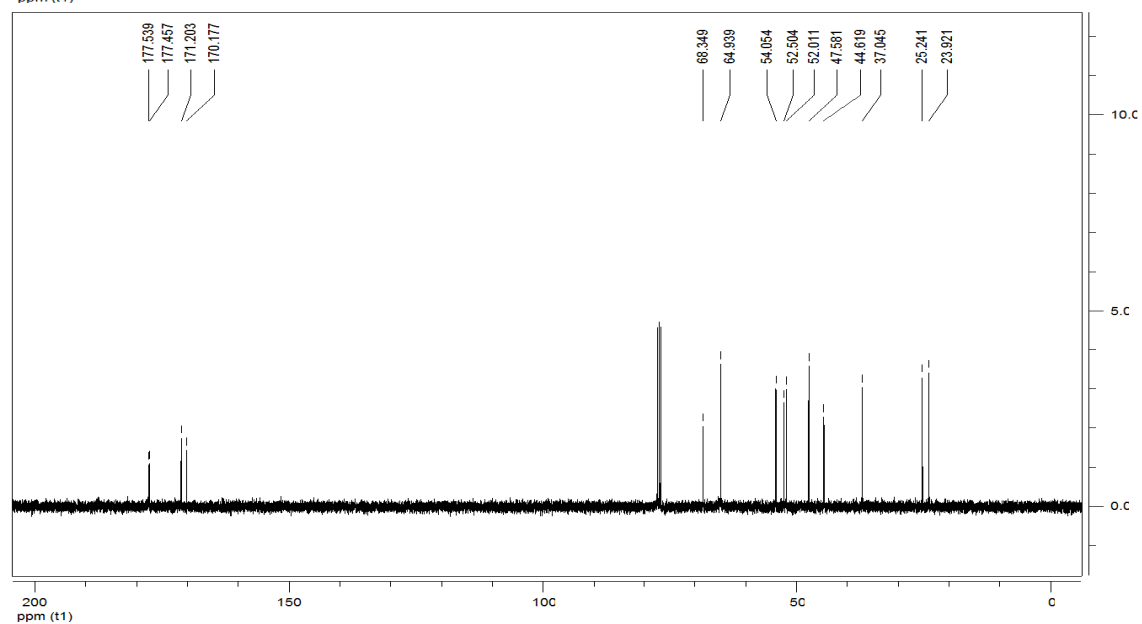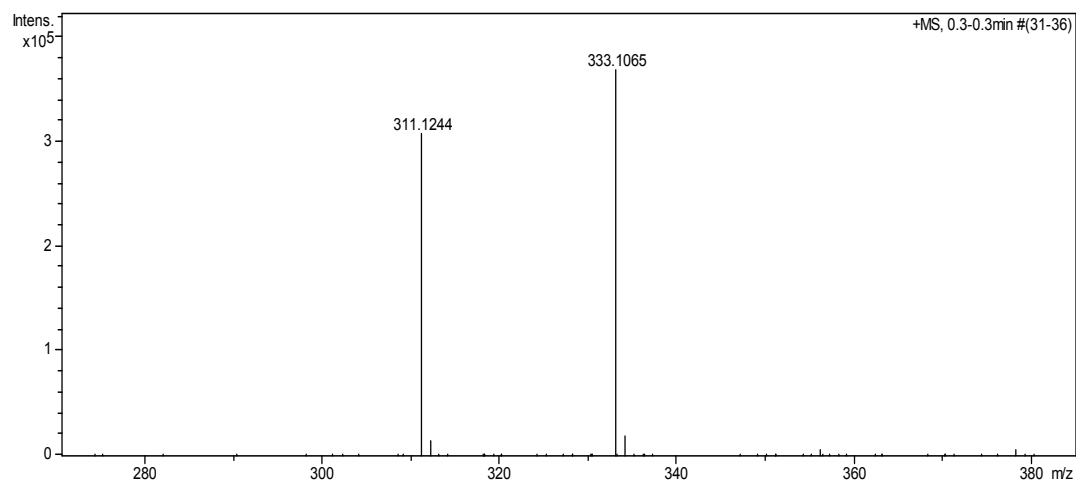

**Methyl 4-(2-methoxy-2-oxoethyl)-2-methyl-1,3-dioxodecahydropyrrolo[3,4-a]pyrrolizine- 4-carboxylate(1b):**

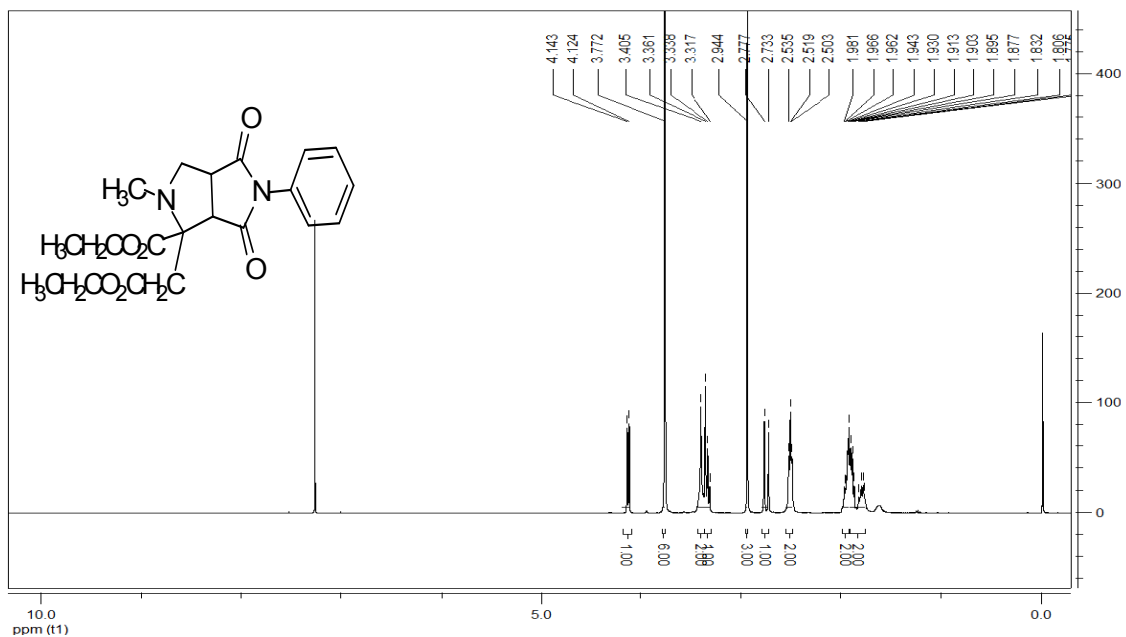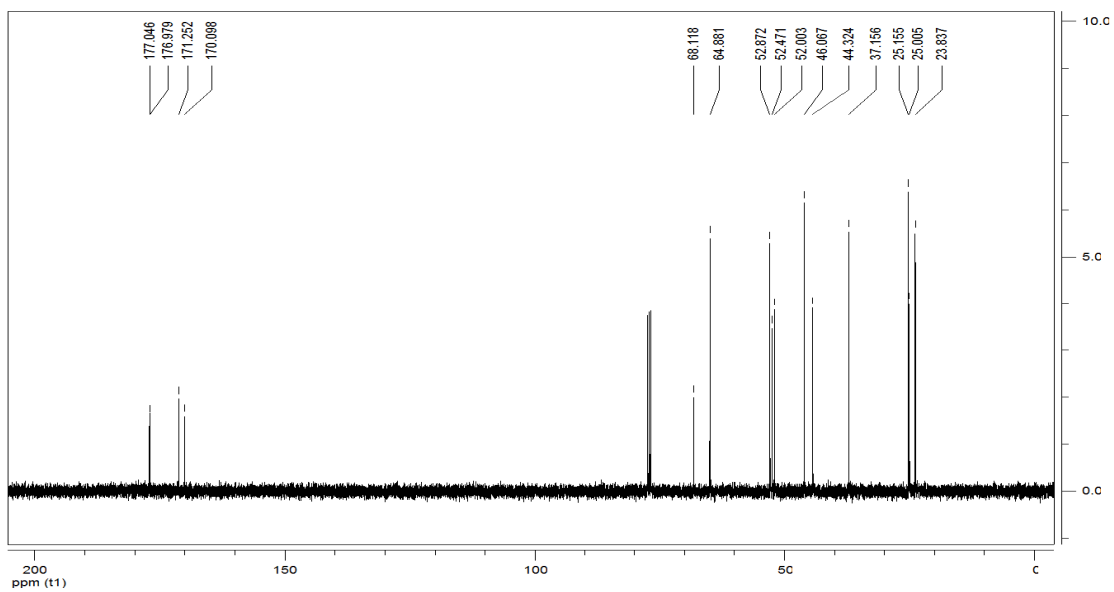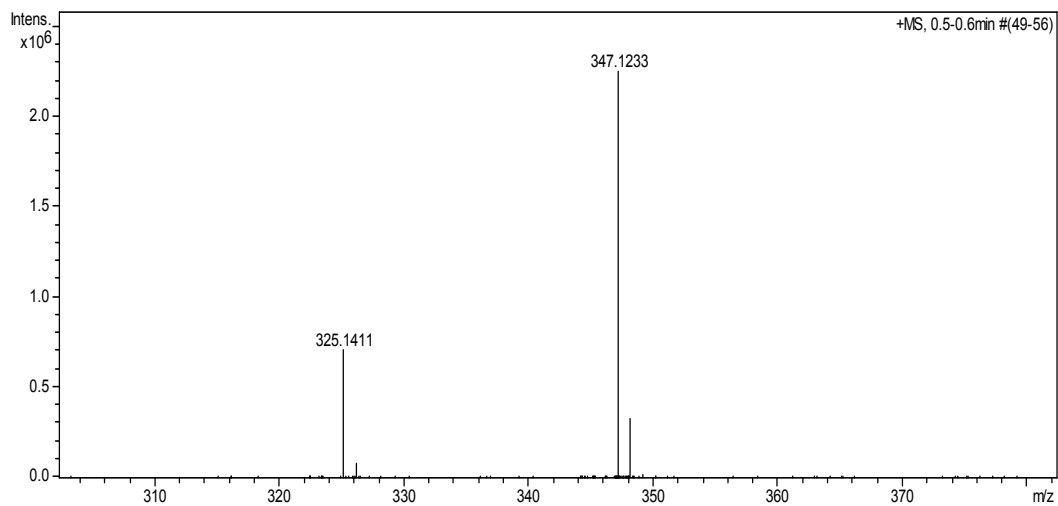

**Methyl 4-(2-methoxy-2-oxoethyl)-1,3-dioxo-2-phenyldecahydropyrrolo[3,4-a]pyrrolizine-4-carboxylate (1c):**

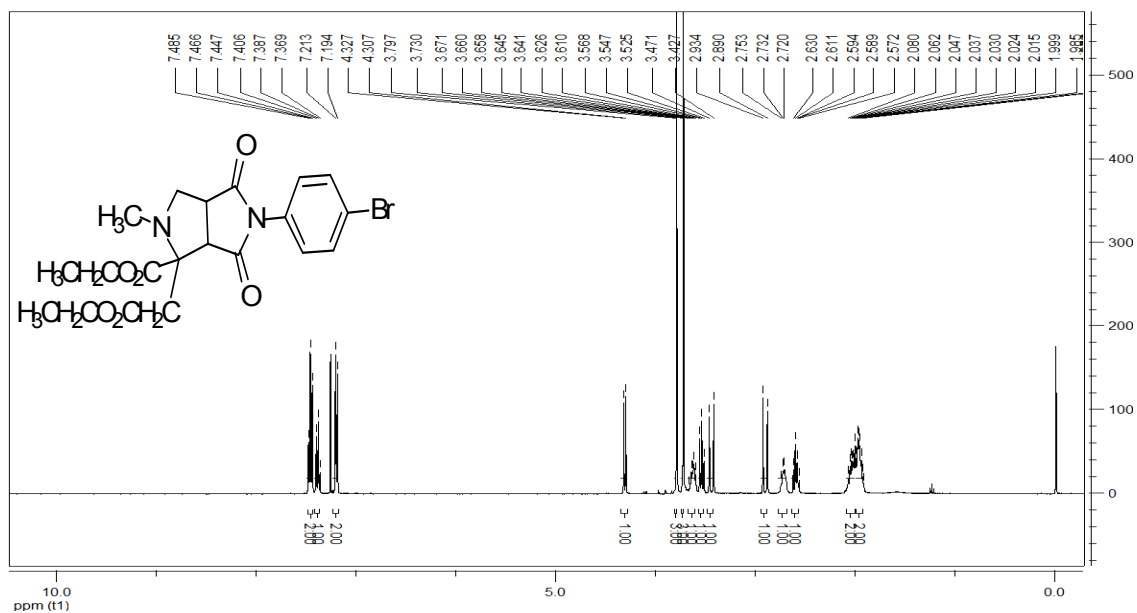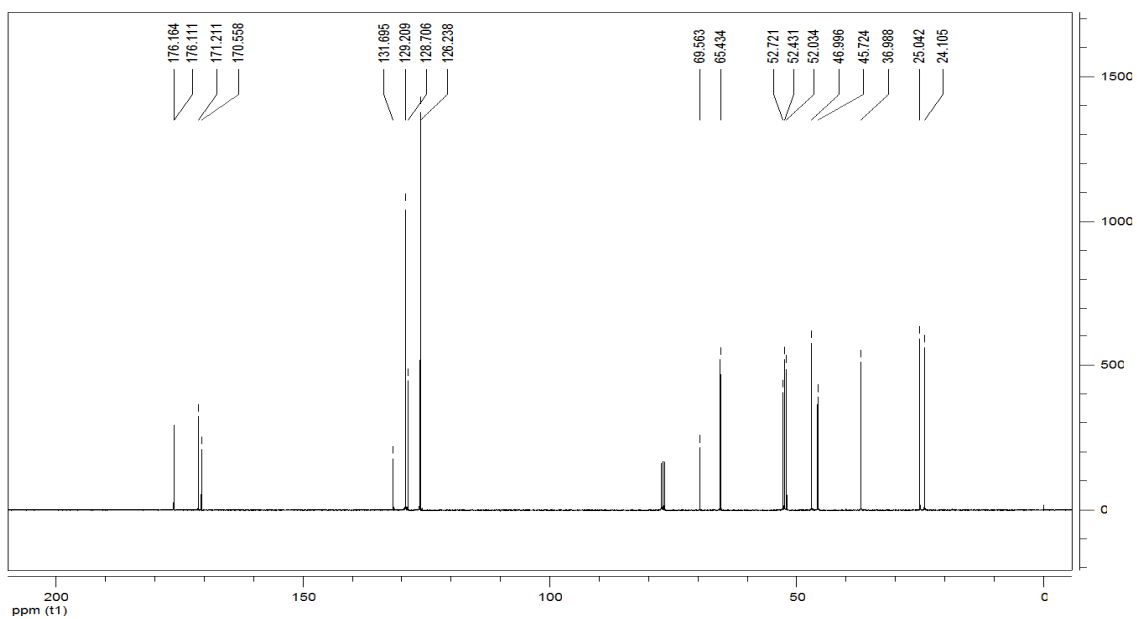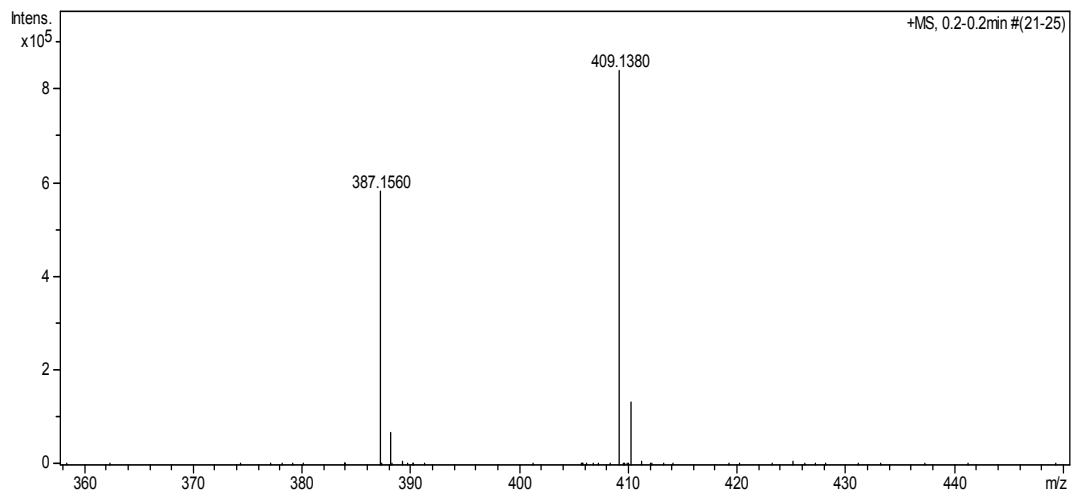

**Methyl 4-(2-methoxy-2-oxoethyl)-2-(4-methoxyphenyl)-1,3-dioxodecahydropyrrolo[3,4-a]pyrrolizine-4-carboxylate (1d):**

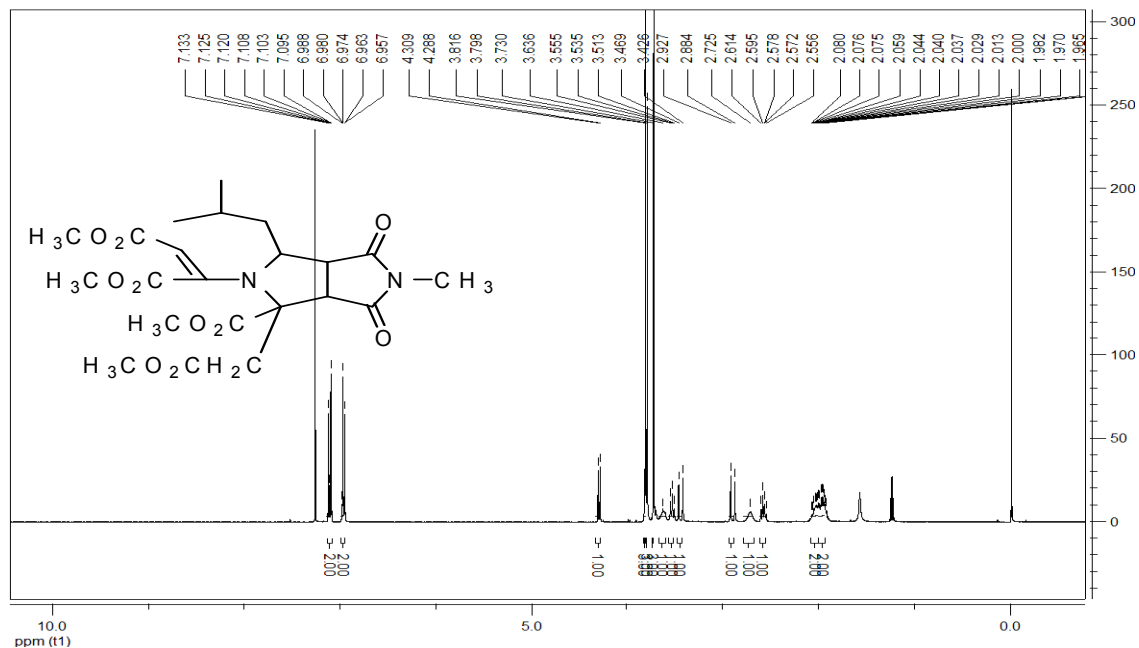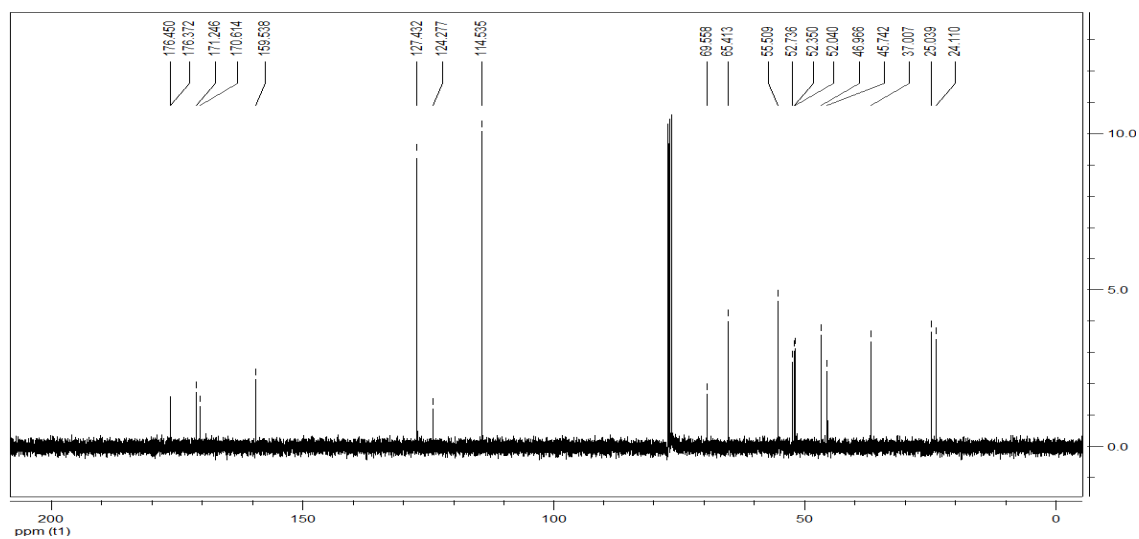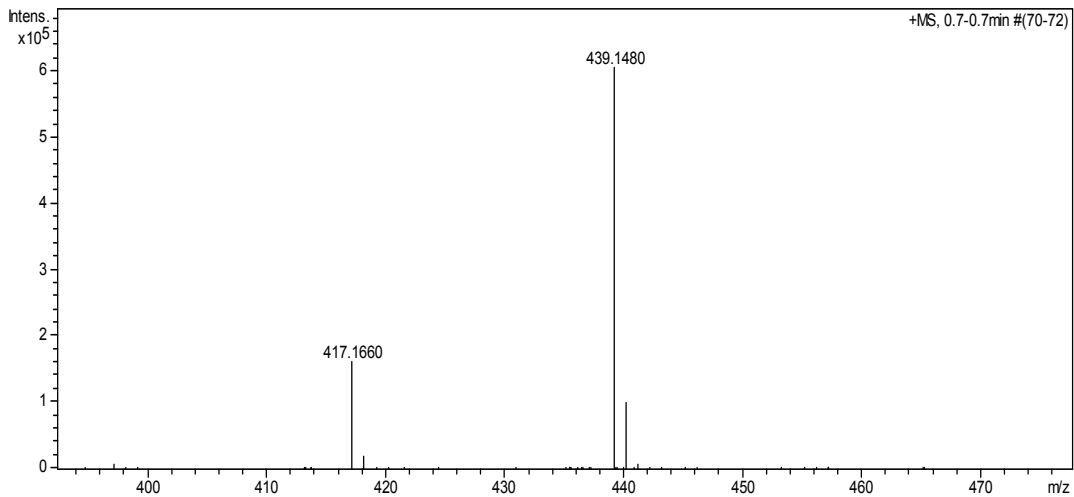









**Ethyl 2-(4-chlorophenyl)-4-(2-ethoxy-2-oxoethyl)-1,3-dioxodecahydropyrrolo[3,4-a]pyrrolizine-4-carboxylate (1h):**

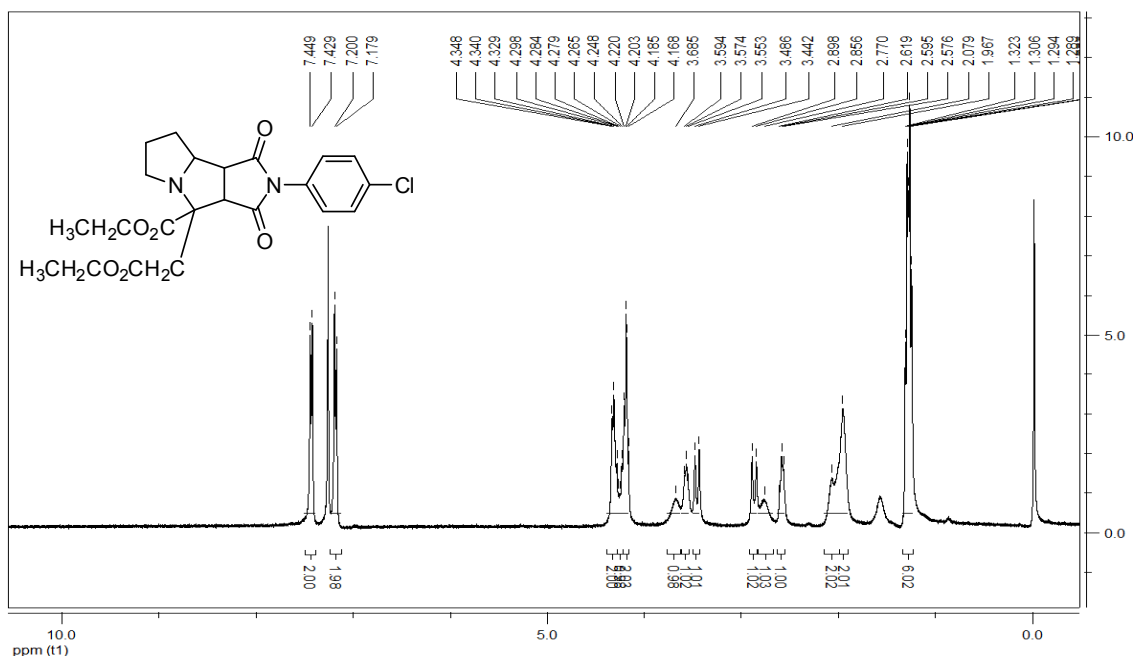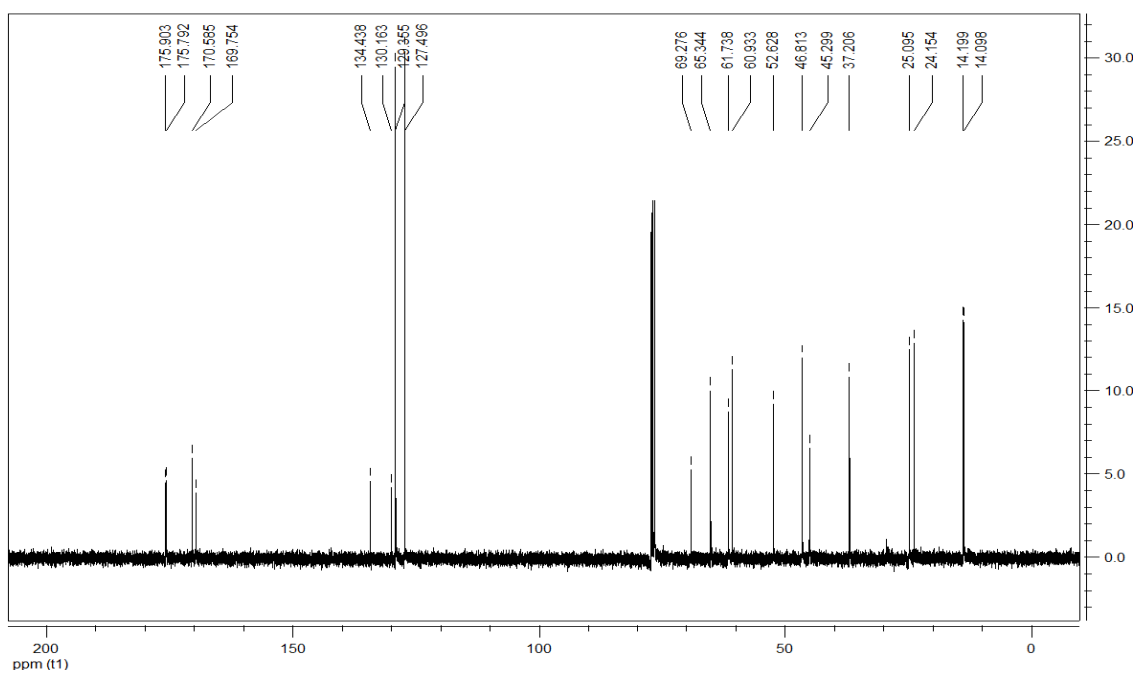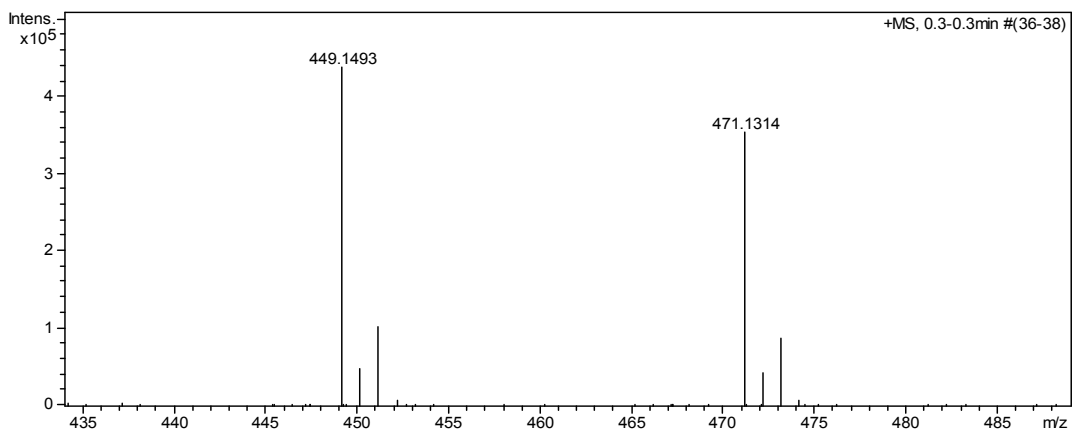







**Methyl 5-(2-methoxy-2-oxoethyl)-6,8-dioxo-7-phenyloctahydro-1H-pyrrolo[3',4':3,4]-pyrrolo[1,2-c]thiazole-5-carboxylate (2c):**

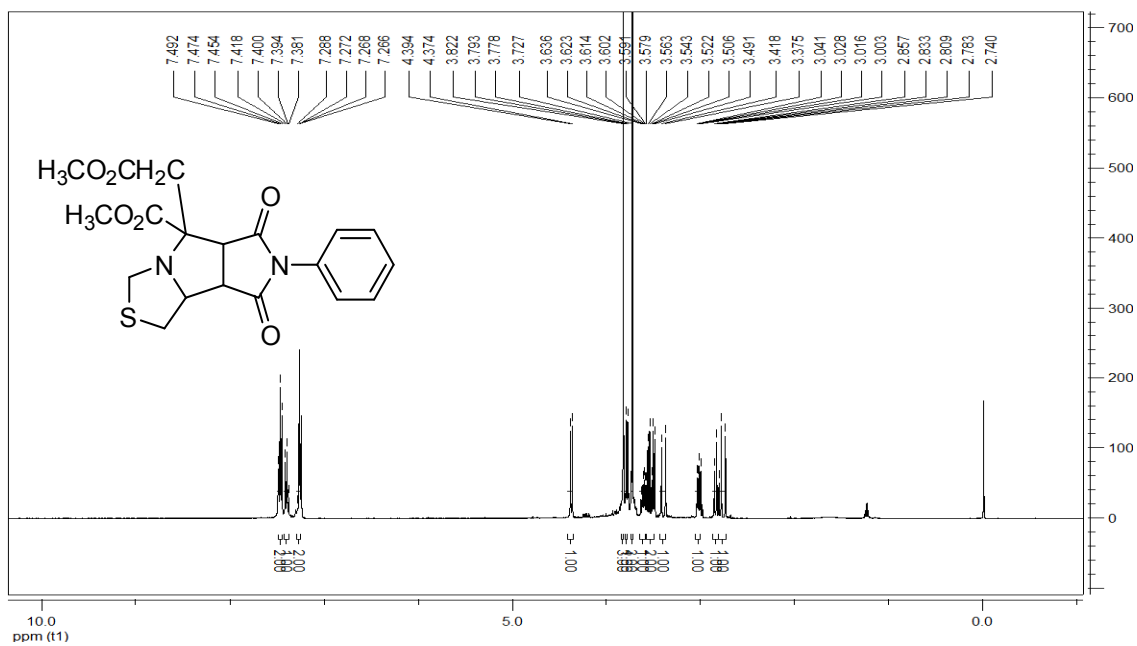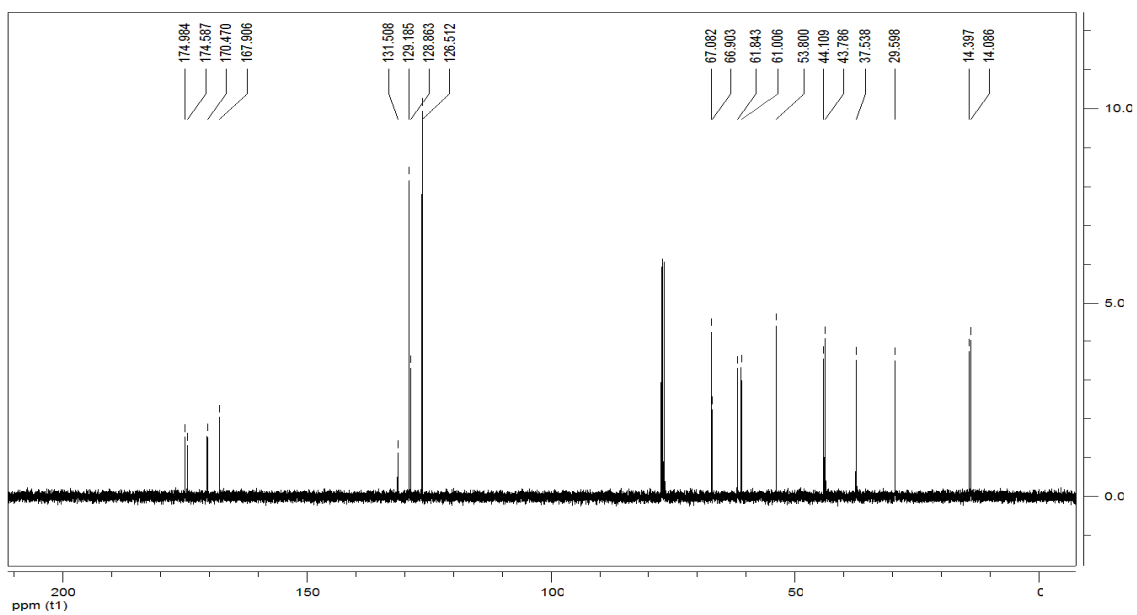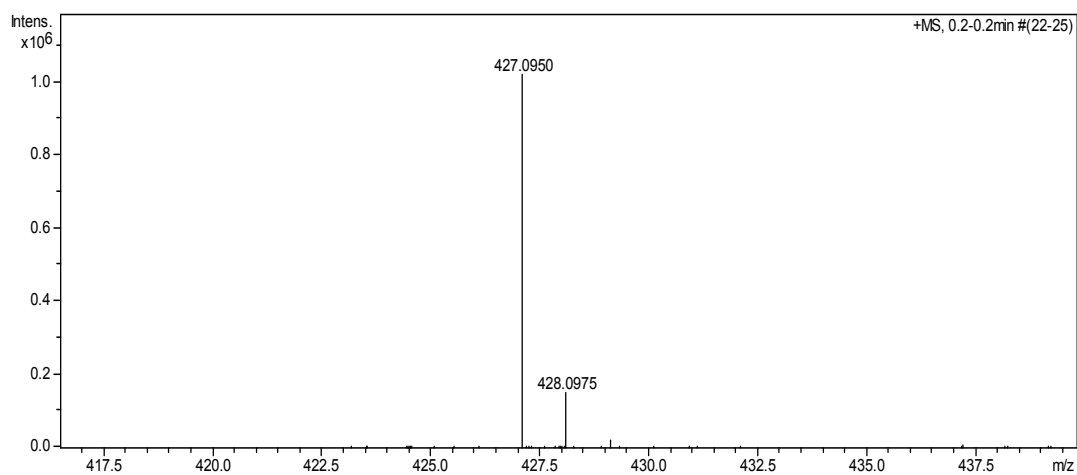



**Methyl 5-(2-methoxy-2-oxoethyl)-6,8-dioxo-7-(p-tolyl)octahydro-1H-pyrrolo[3',4':3,4]-pyrrolo[1,2-c]thiazole-5-carboxylate (2d):**

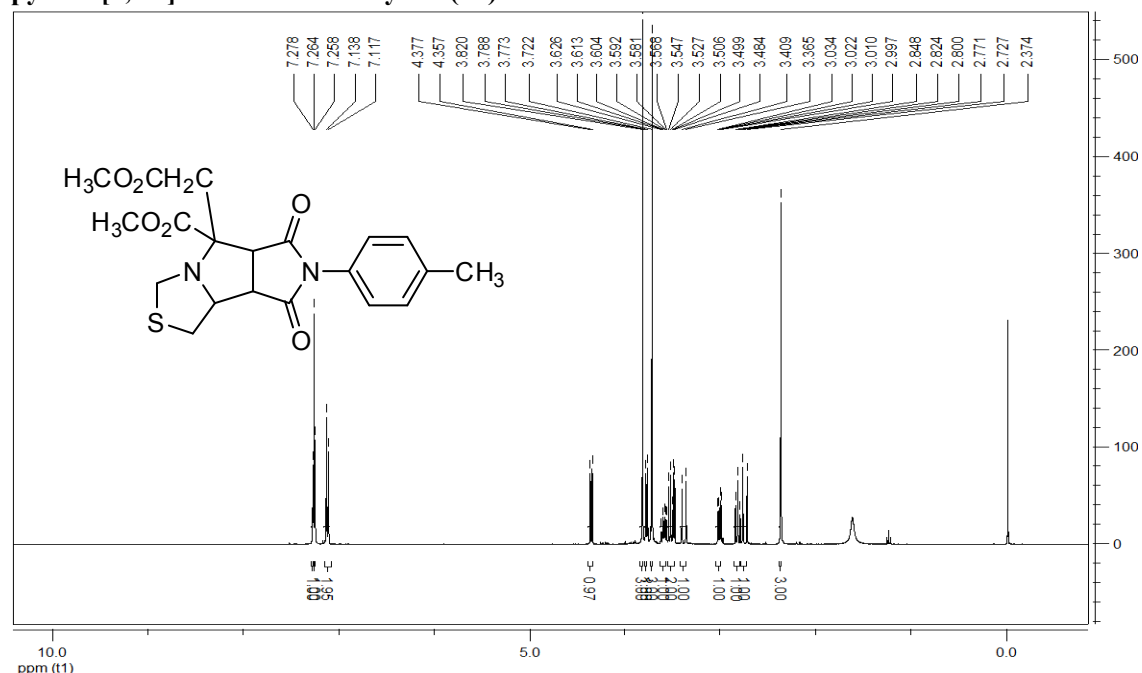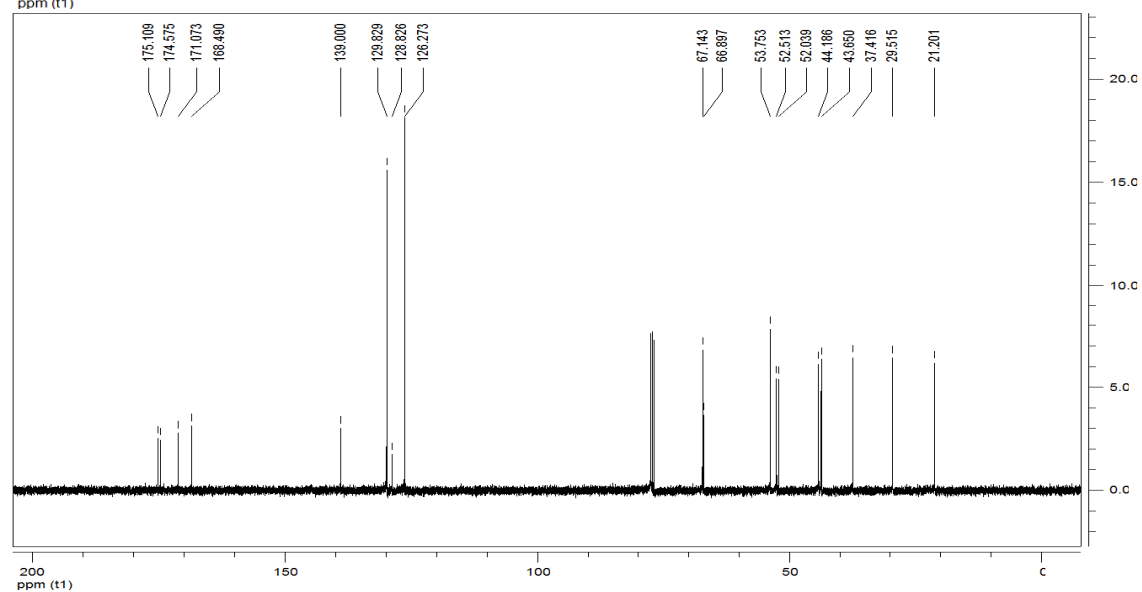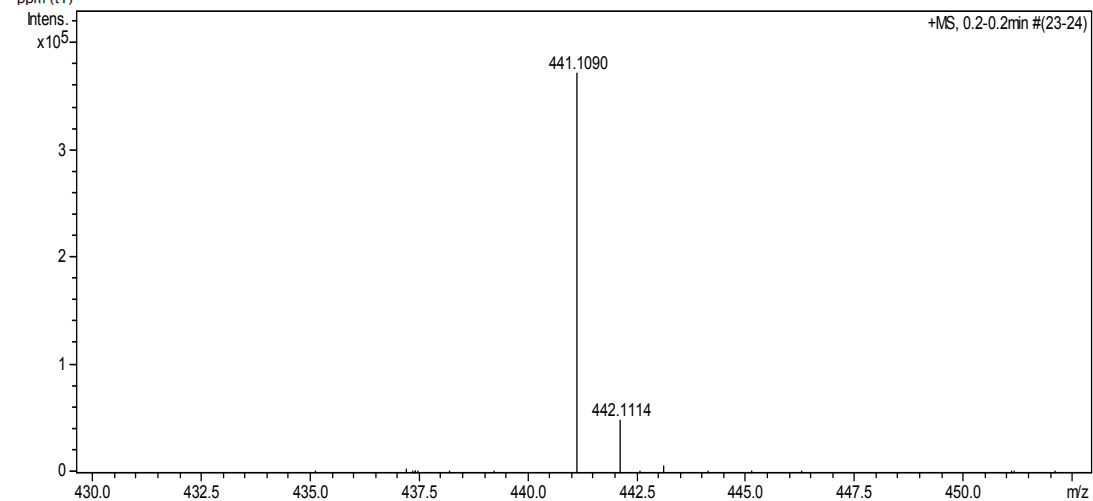



# Methyl

## 7-(4-bromophenyl)-5-(2-methoxy-2-oxoethyl)-6,8-dioxooctahydro-1H-pyrrolo[3',4':3,4]pyrrolo[1,2-c]thiazole-5-carboxylate (2f):

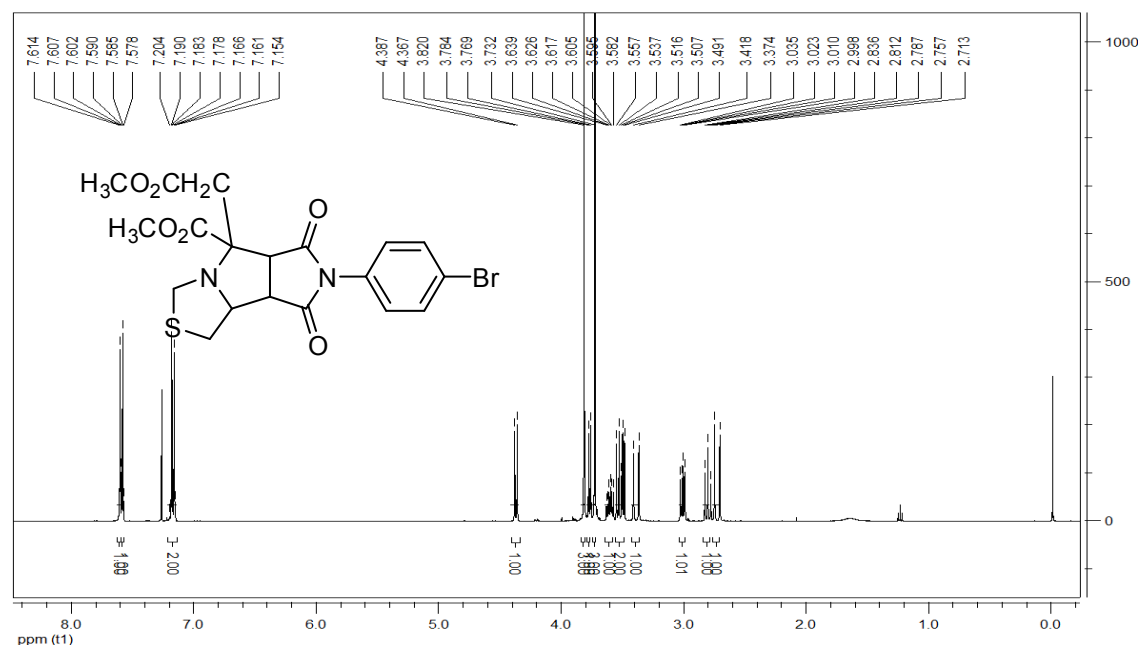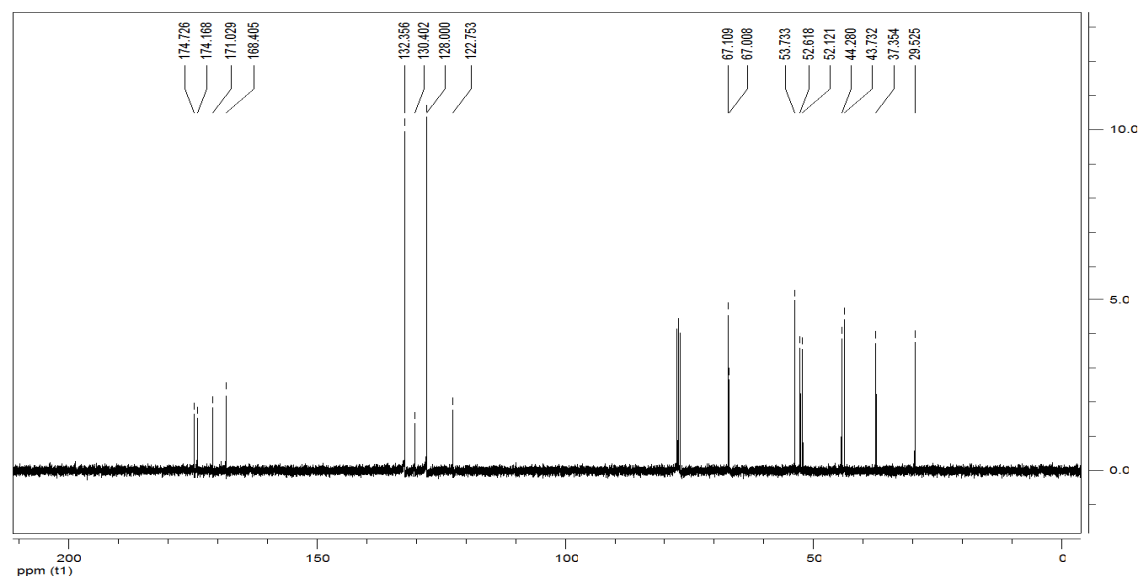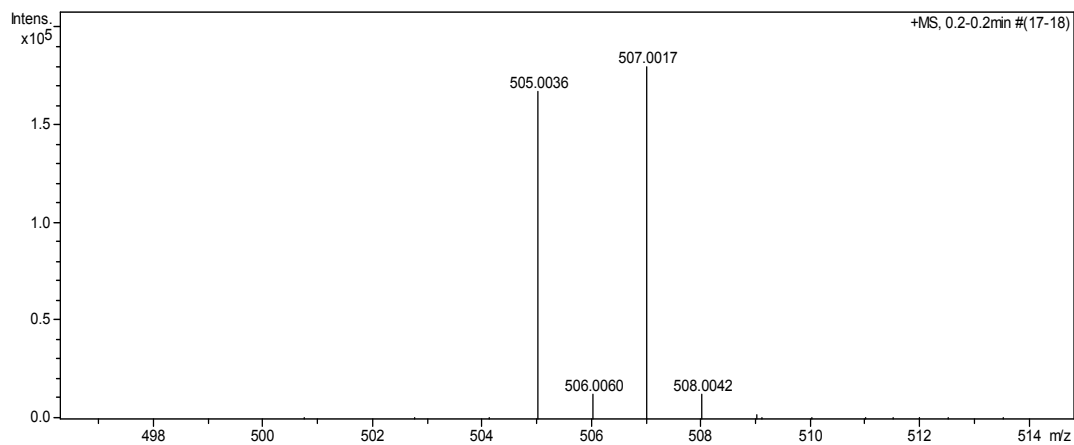





**Methyl 2-(4-bromophenyl)-4-(2-methoxy-2-oxoethyl)-1,3-dioxodecahydro-1H-pyrrolo[3,4-a]indolizine-4-carboxylate (3b):**

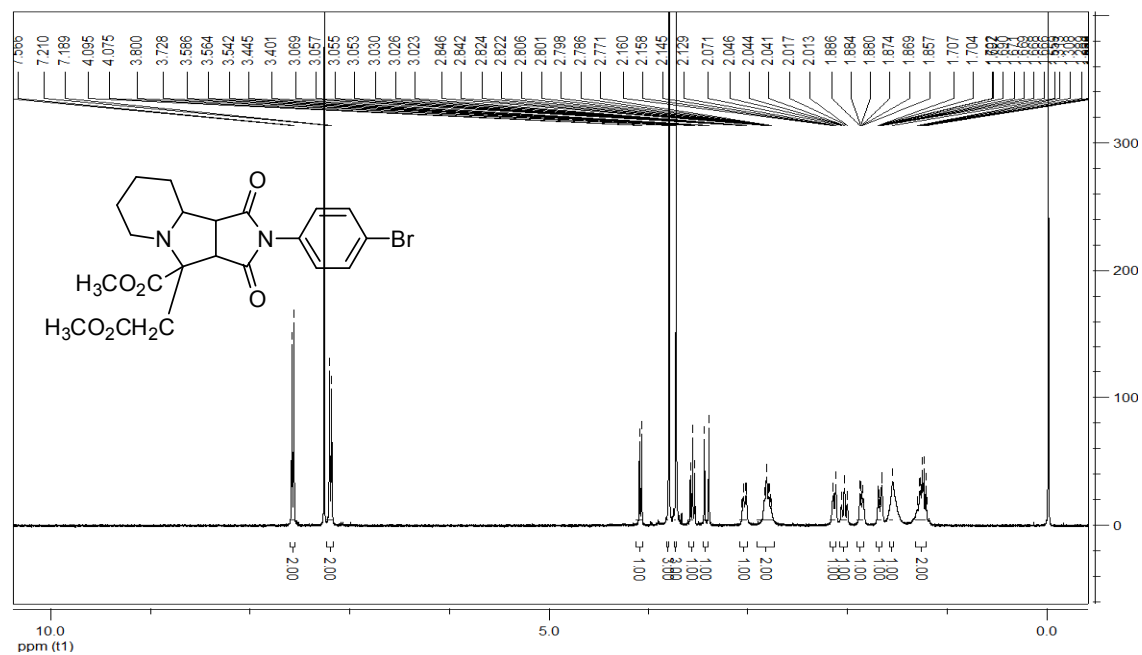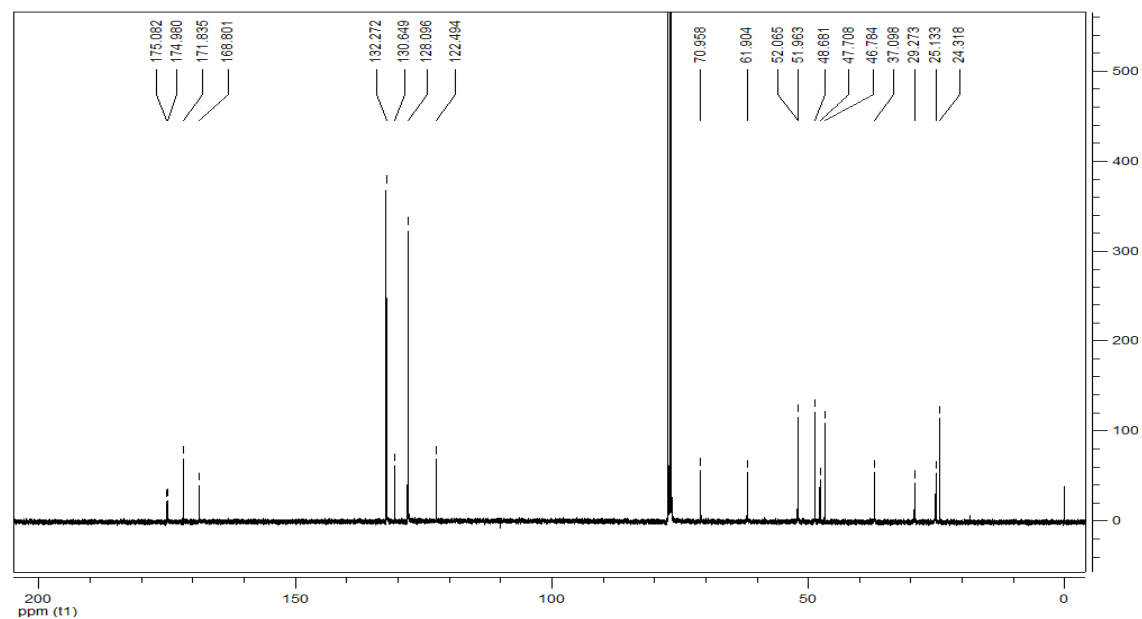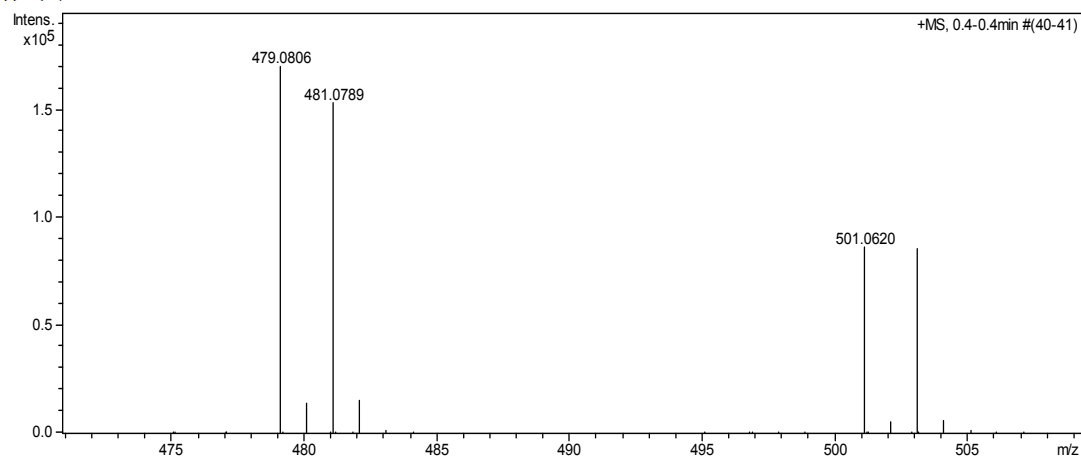



**Dimethyl 2-(1-(2-methoxy-2-oxoethyl)-1-(methoxycarbonyl)-5-methyl-4,6-dioxohexahydro-pyrrolo[3,4-c]pyrrol-2(1H)-yl)maleate (4a):**

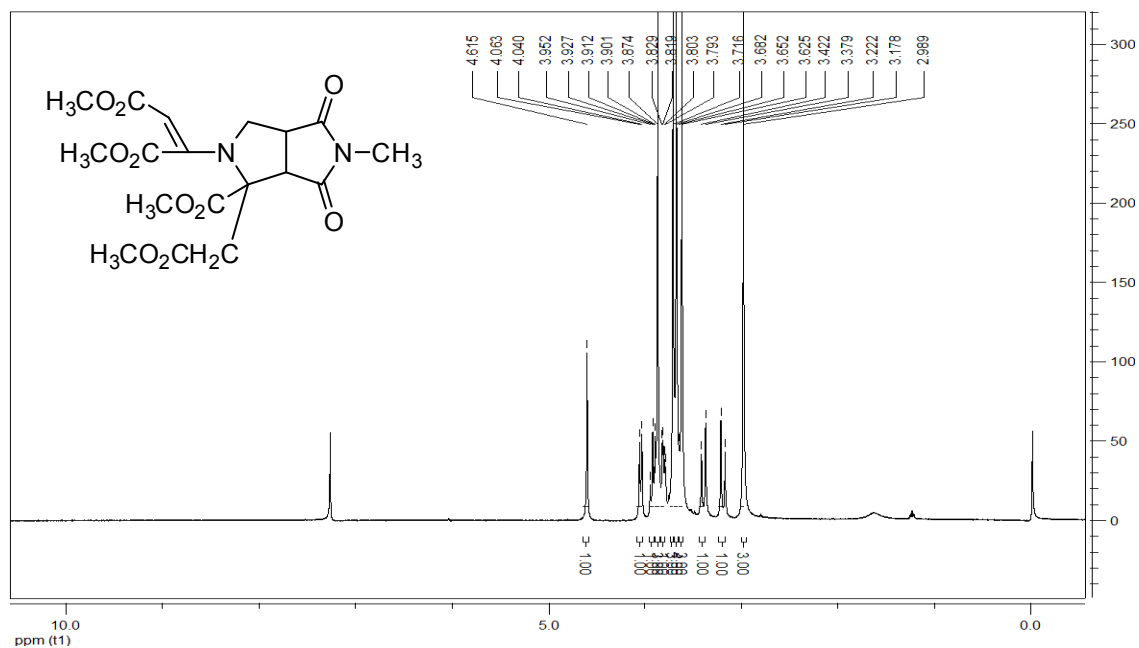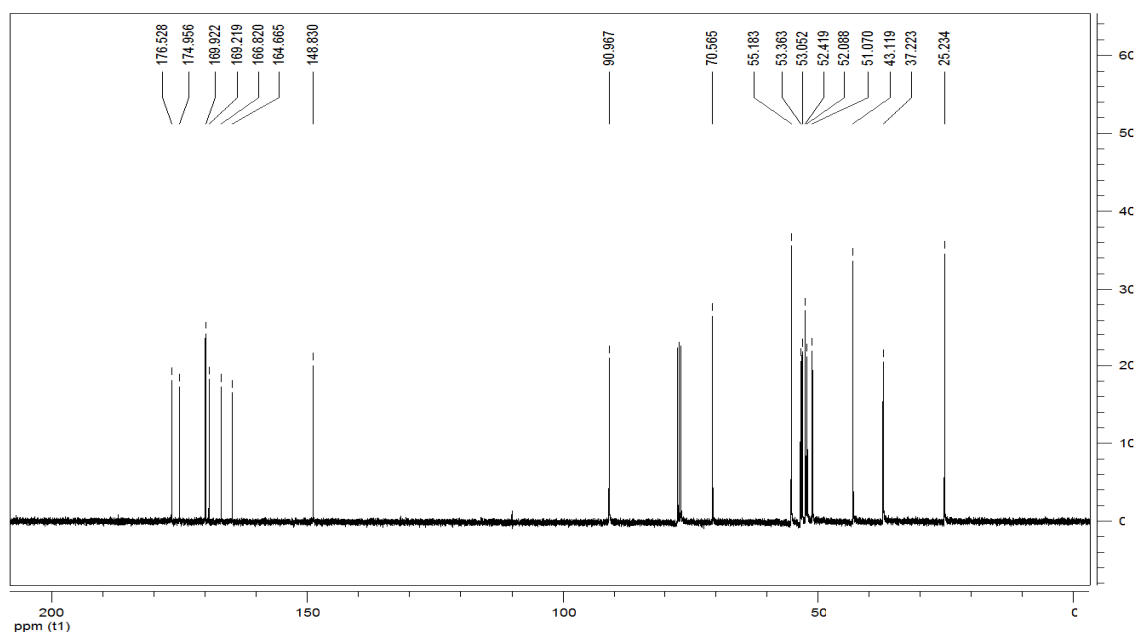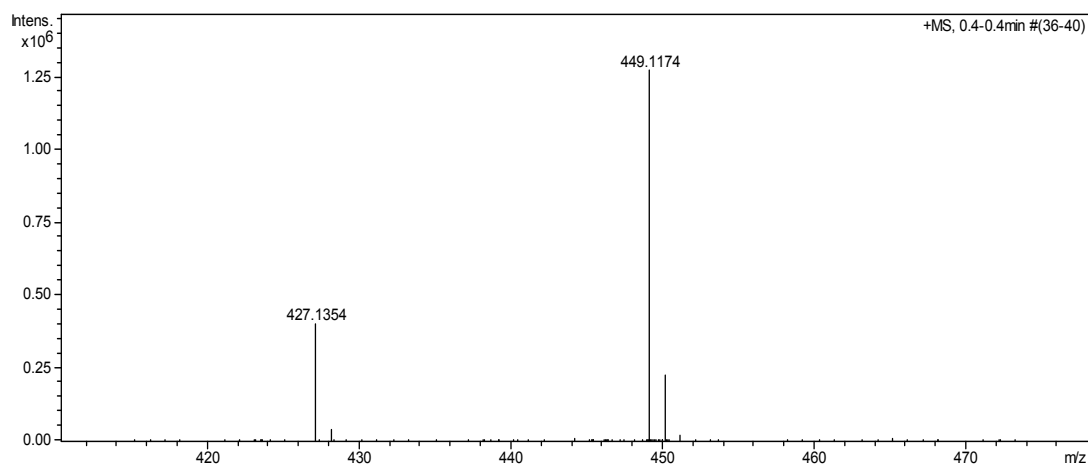



**Dimethyl 2-(1-(2-methoxy-2-oxoethyl)-1-(methoxycarbonyl)-4,6-dioxo-5-phenylhexahydro-pyrrolo[3,4-c]pyrrol-2(1H)-yl)maleate (4b):**

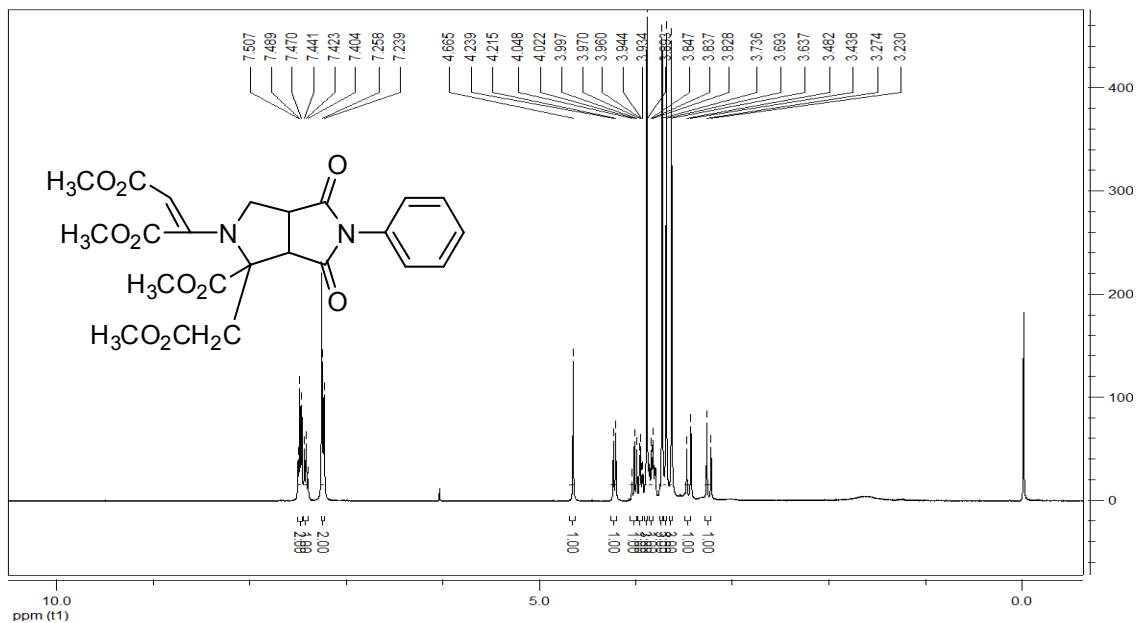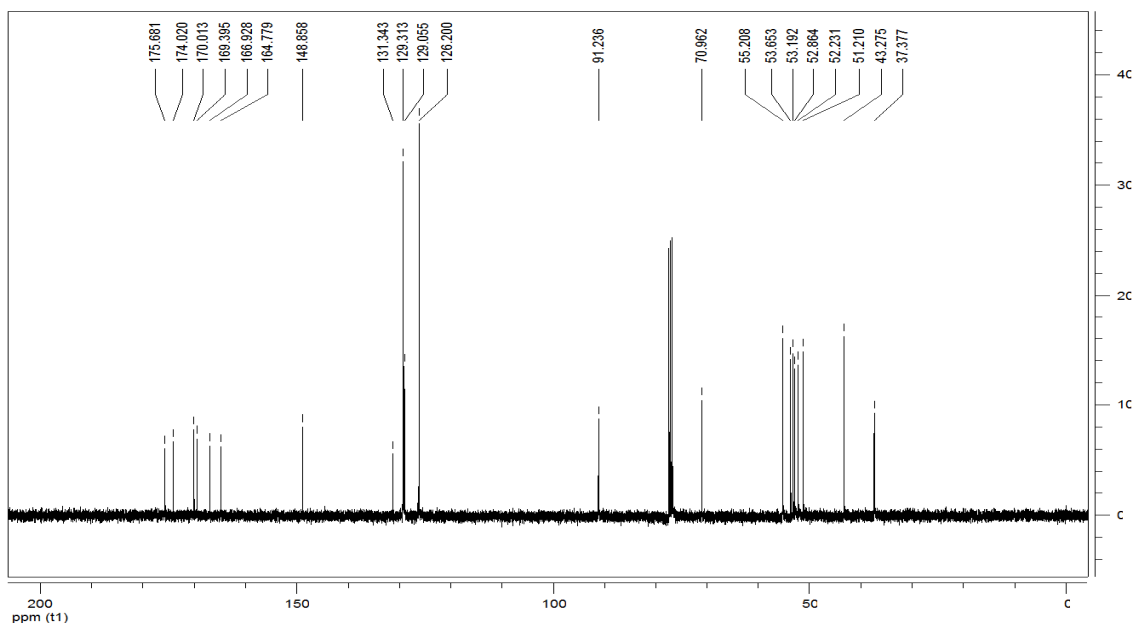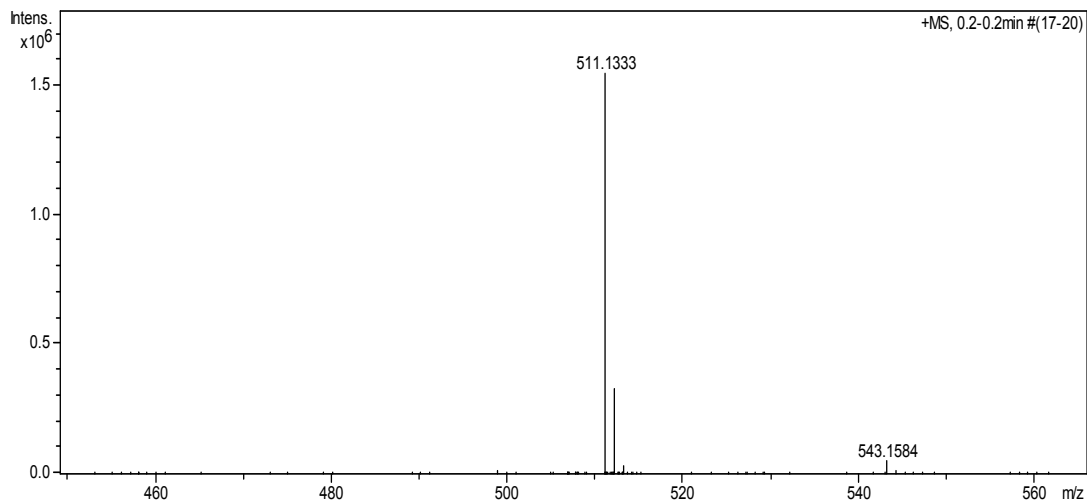

**Diethyl 2-(5-(4-bromophenyl)-1-(2-ethoxy-2-oxoethyl)-1-(ethoxycarbonyl)-4,6-dioxohexahydropyrrolo[3,4-c]pyrrol-2(1H)-yl)maleate (4c):**

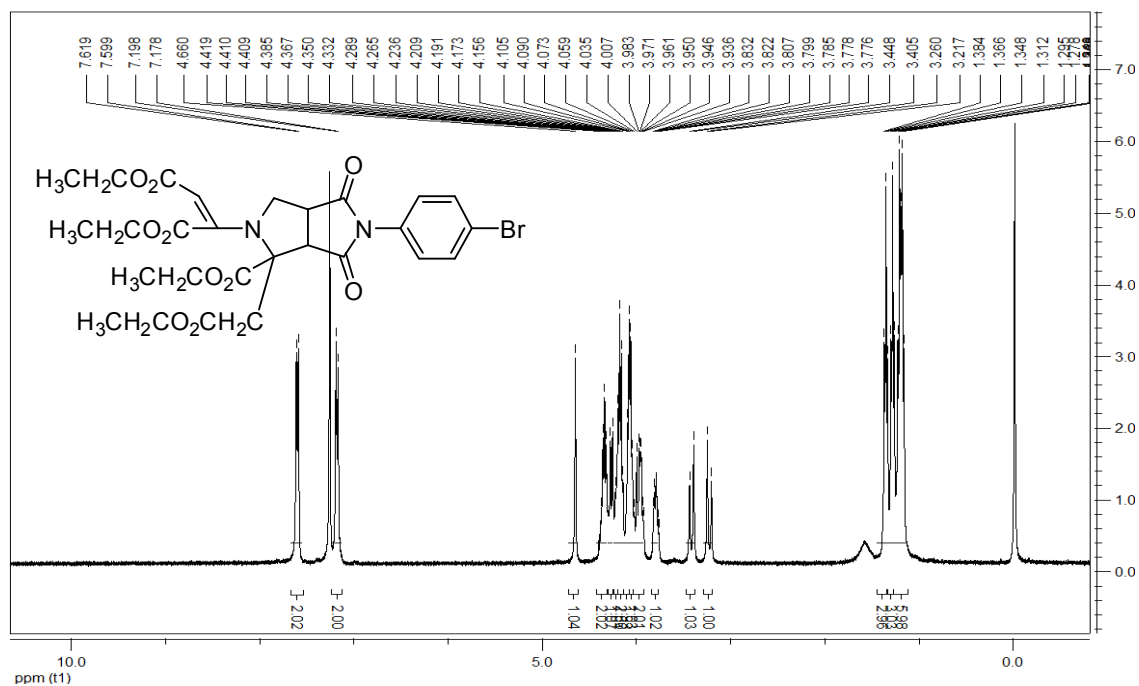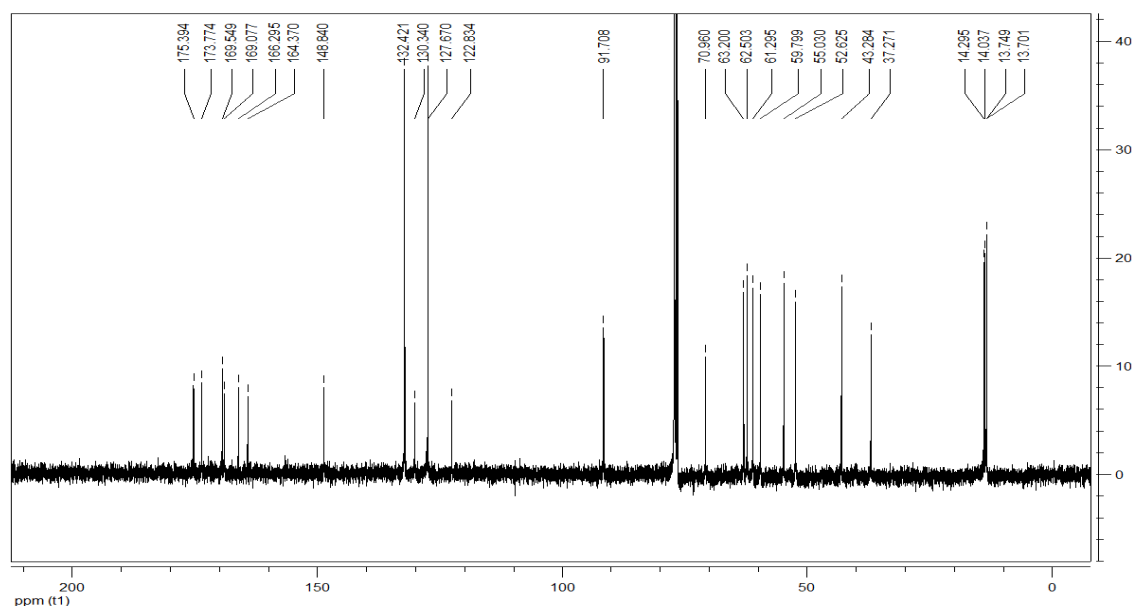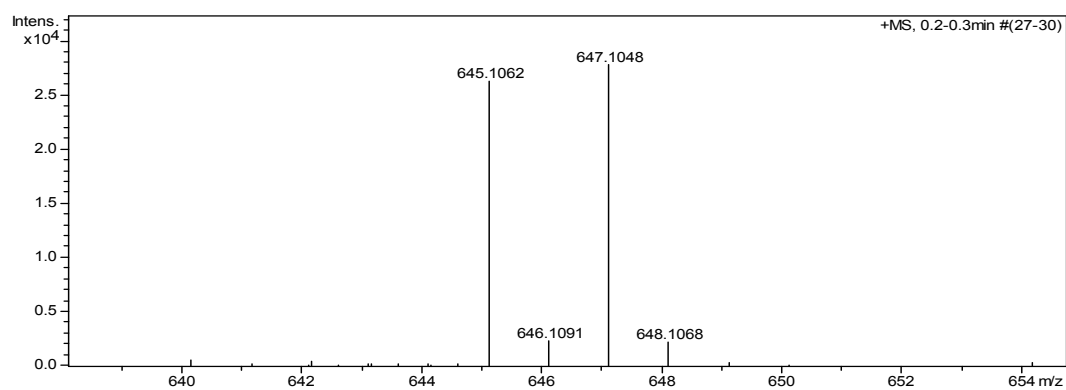

**Dimethyl 2-(1-(2-methoxy-2-oxoethyl)-1-(methoxycarbonyl)-3,5-dimethyl-4,6-dioxohexa-hydropyrrolo[3,4-c]pyrrol-2(1H)-yl)maleate (4d):**

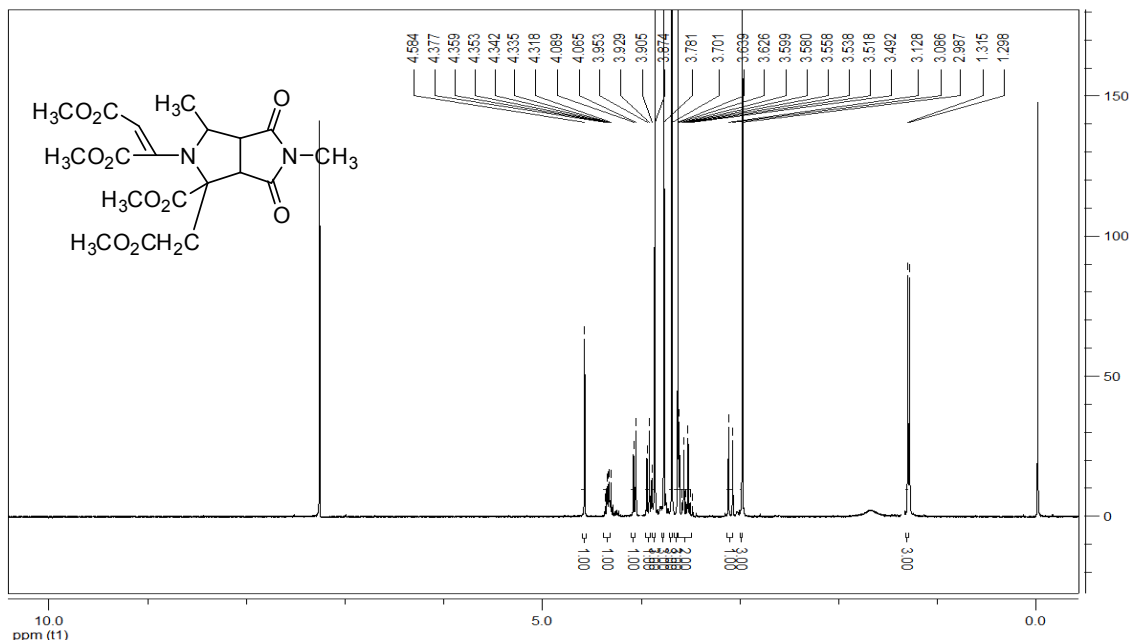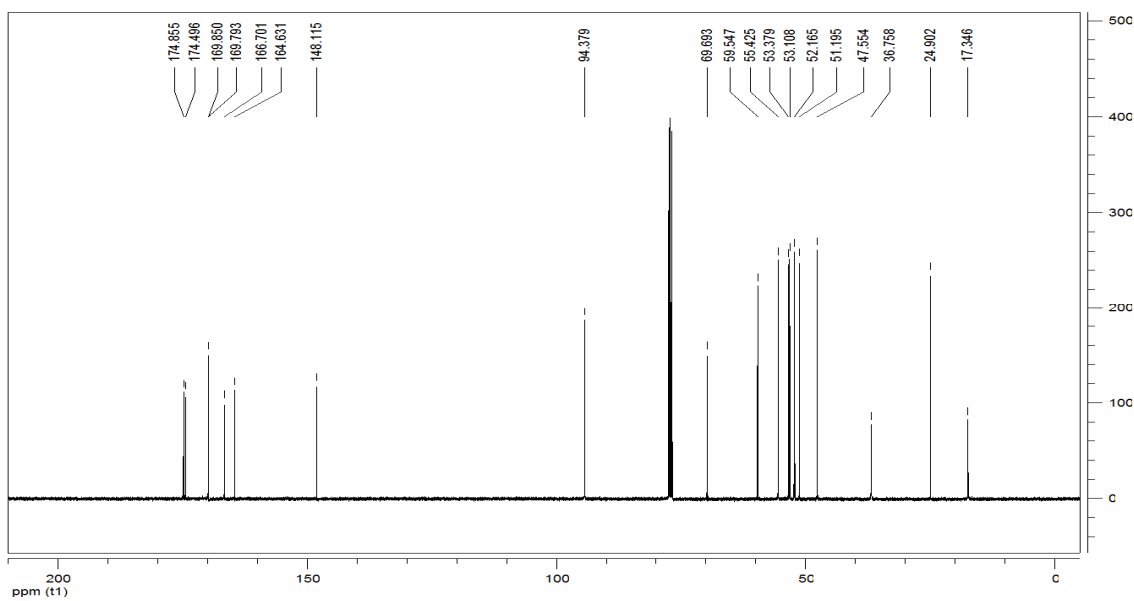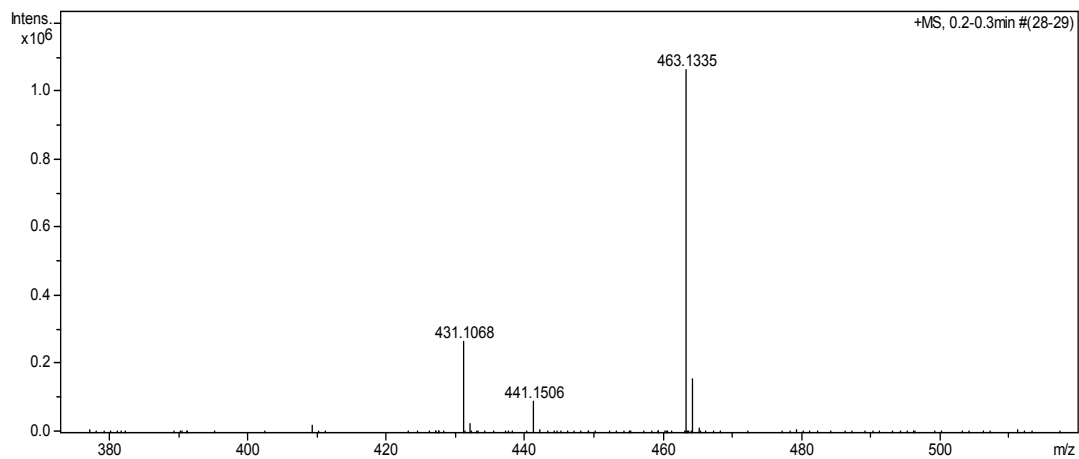

**Dimethyl 2-(1-(2-methoxy-2-oxoethyl)-1-(methoxycarbonyl)-3-methyl-4,6-dioxohexahydro-pyrrolo[3,4-c]pyrrol-2(1H)-yl)maleate (4e):**

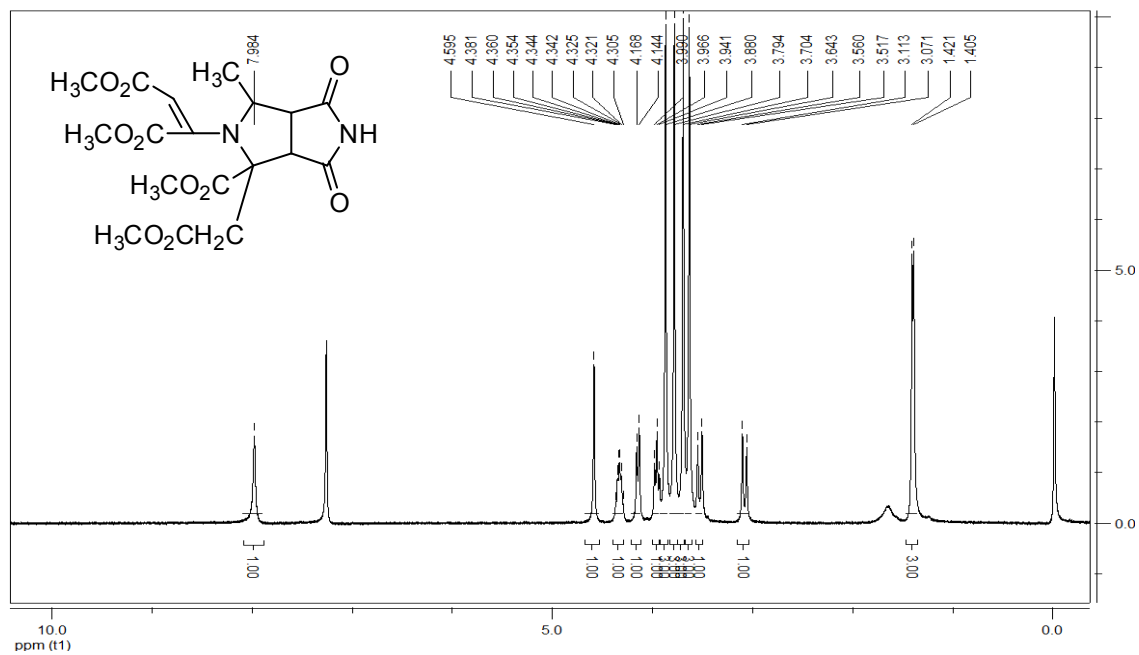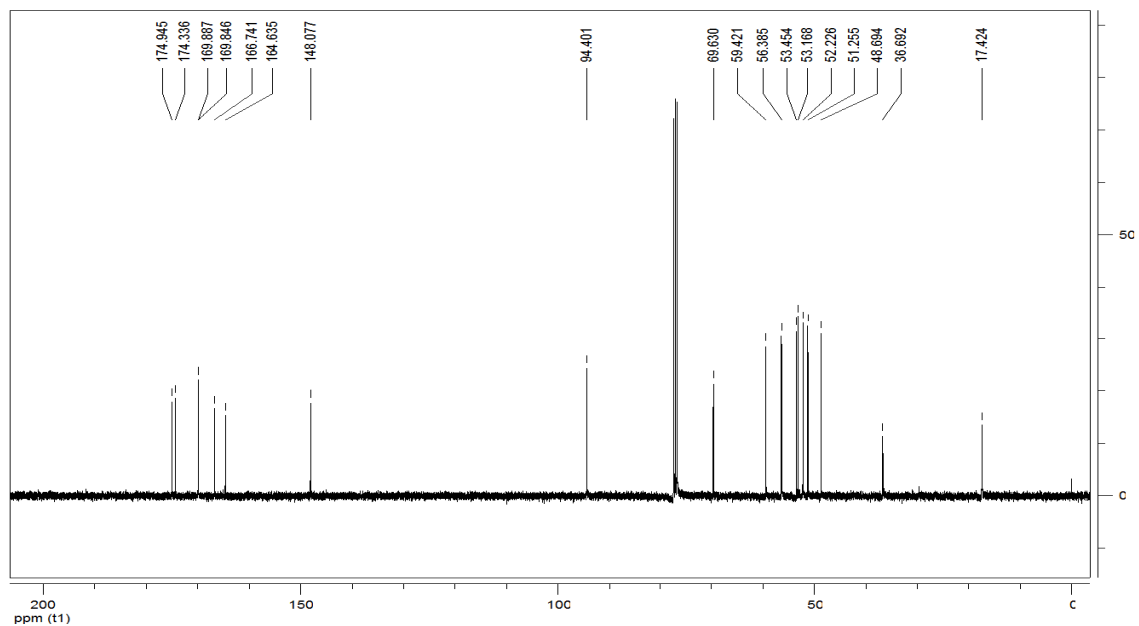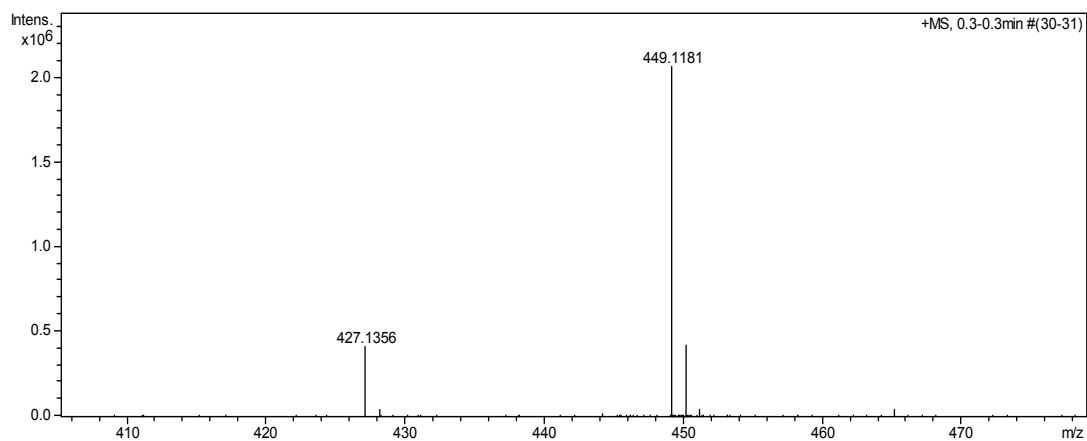

**Dimethyl 2-(1-(2-methoxy-2-oxoethyl)-1-(methoxycarbonyl)-3-methyl-4,6-dioxo-5-phenyl-hexahydropyrrolo[3,4-c]pyrrol-2(1H)-yl)maleate (4f):**

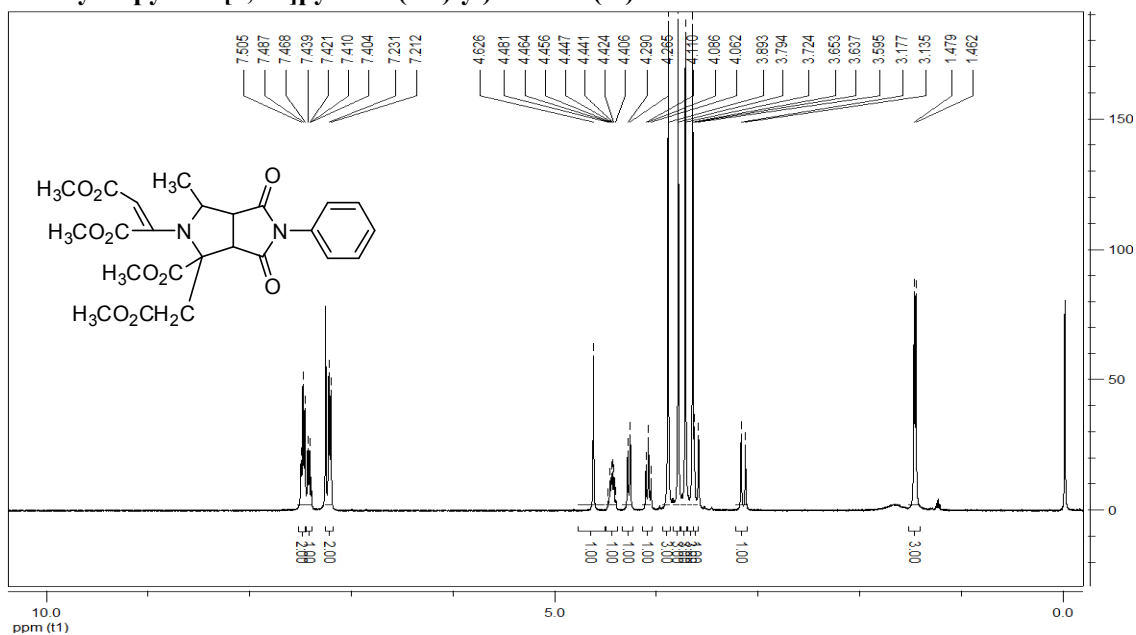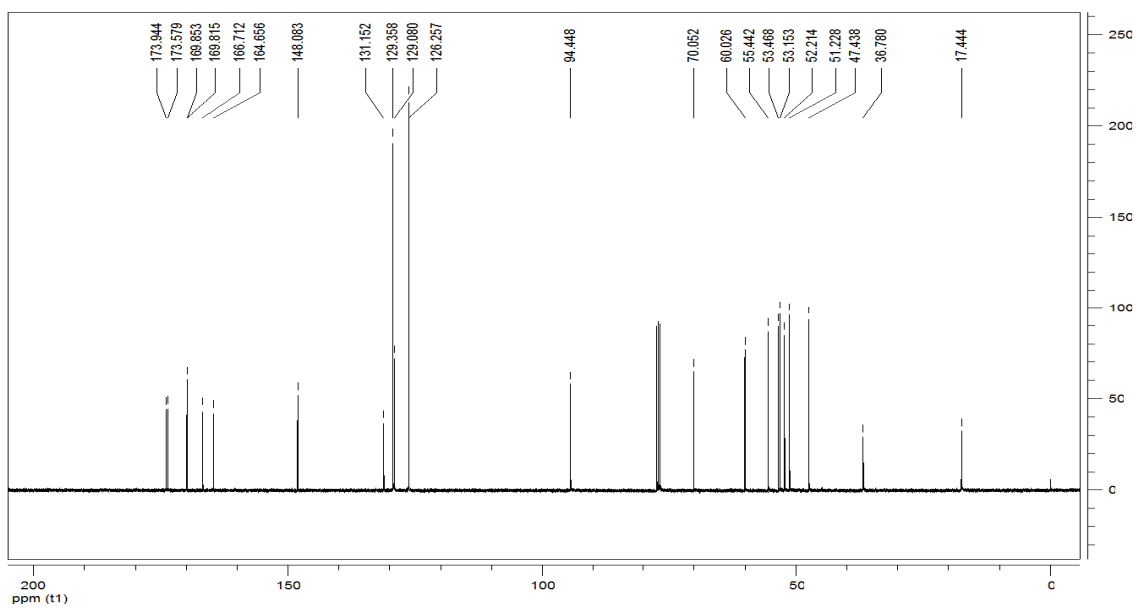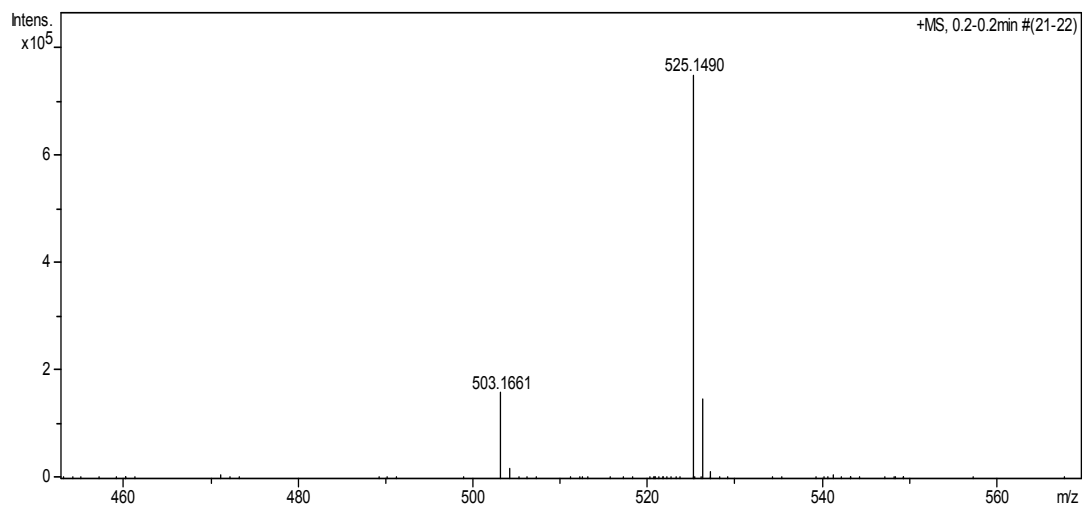

**Dimethyl 2-(5-(4-chlorophenyl)-1-(2-methoxy-2-oxoethyl)-1-(methoxycarbonyl)-3-methyl-4,6-dioxohexahydropyrrolo[3,4-c]pyrrol-2(1H)-yl)maleate (4g):**

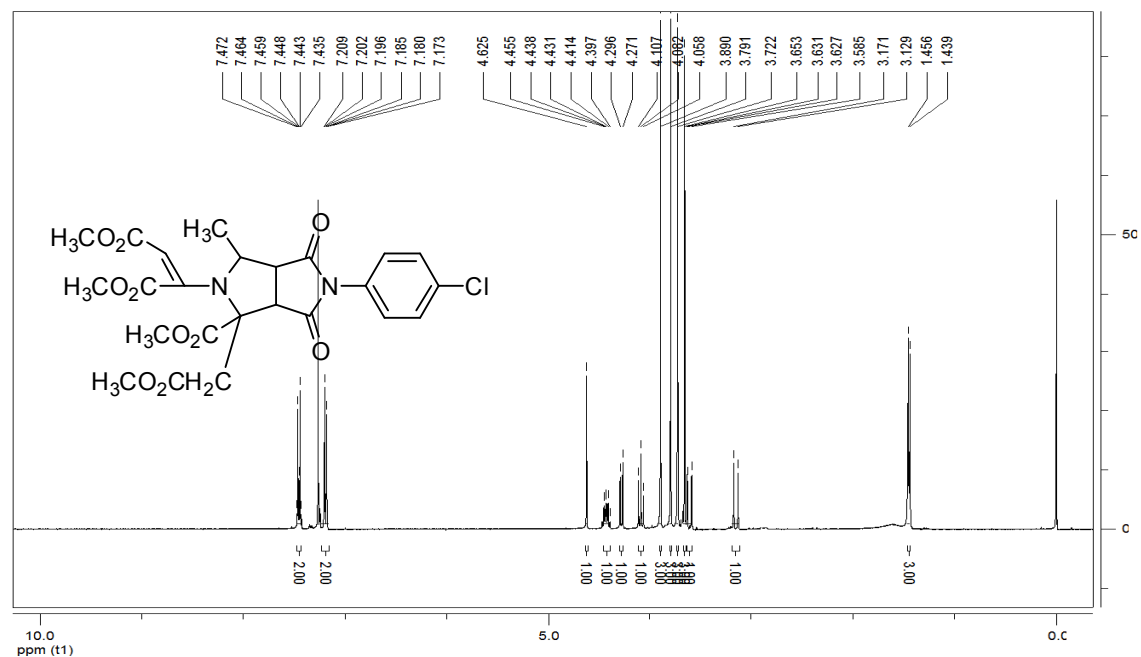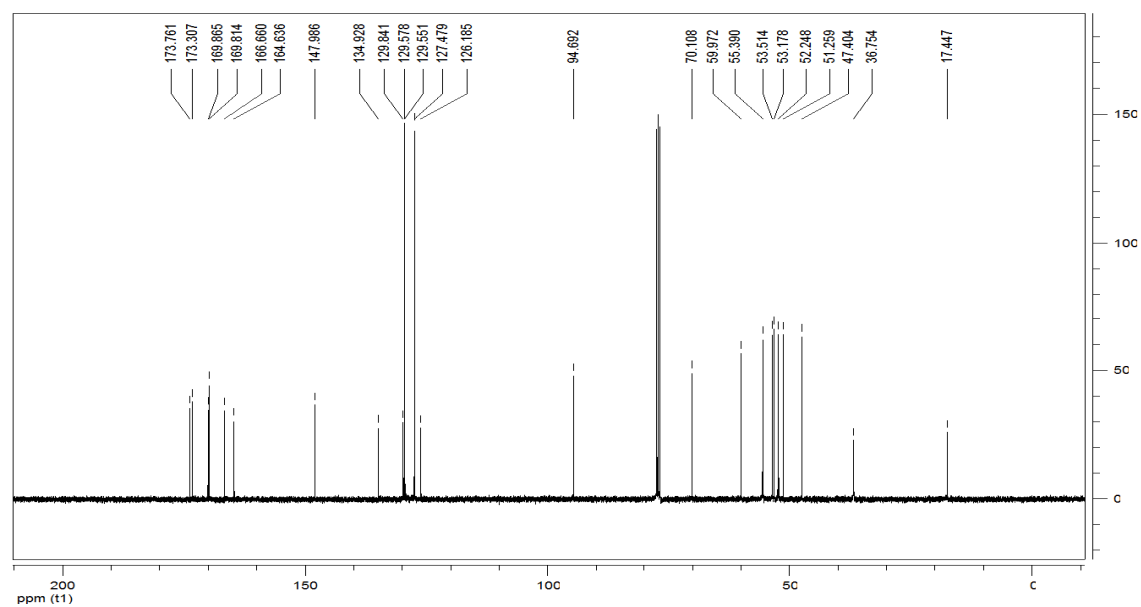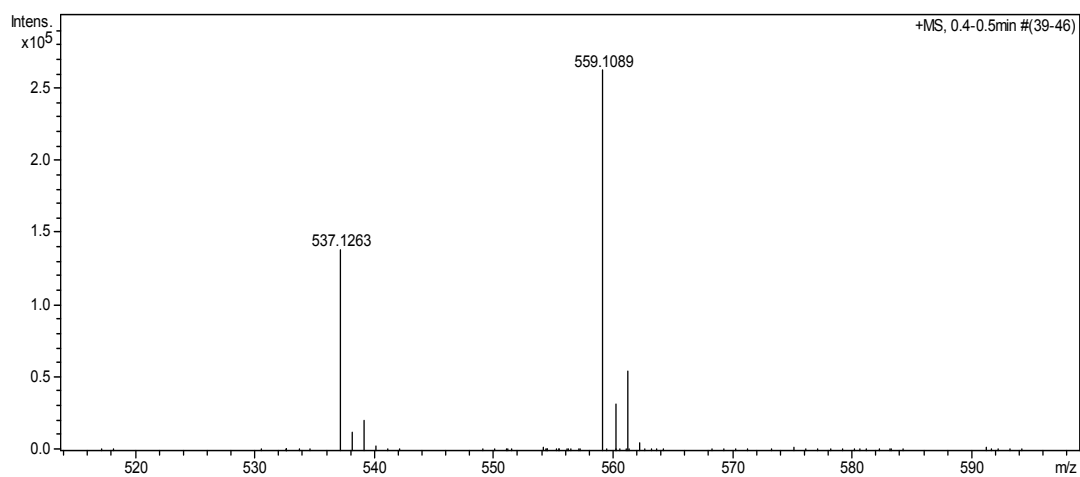

**Dimethyl 2-(5-(4-bromophenyl)-1-(2-methoxy-2-oxoethyl)-1-(methoxycarbonyl)-3-methyl-4,6-dioxohexahydropyrrolo[3,4-c]pyrrol-2(1H)-yl)maleate (4h):**

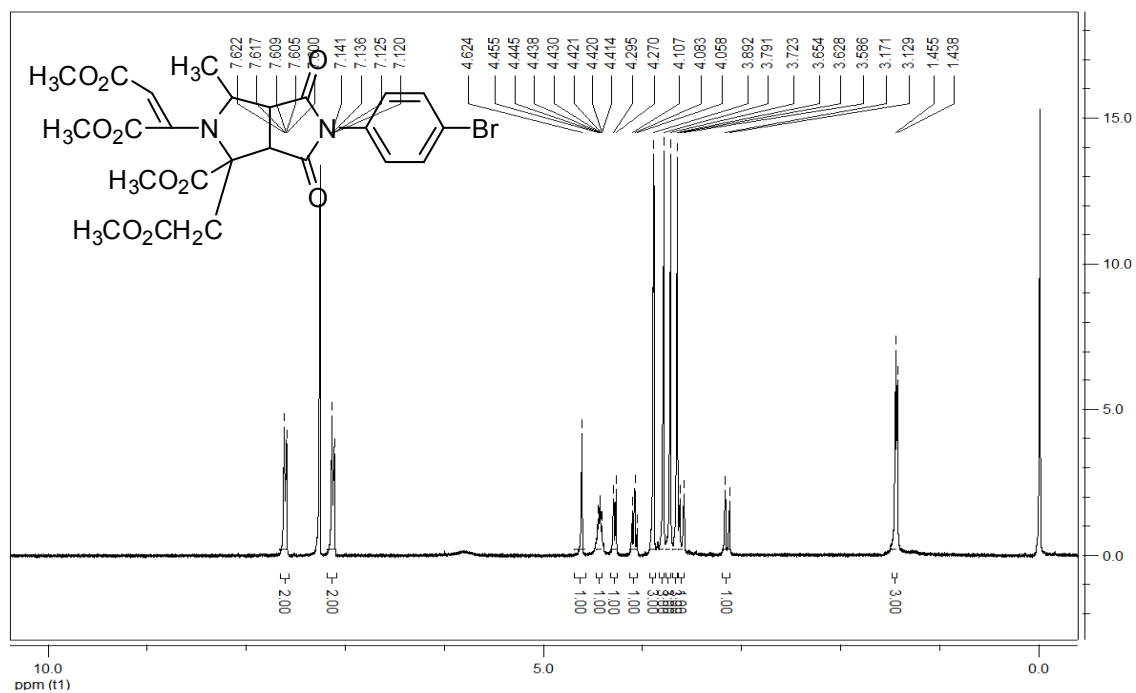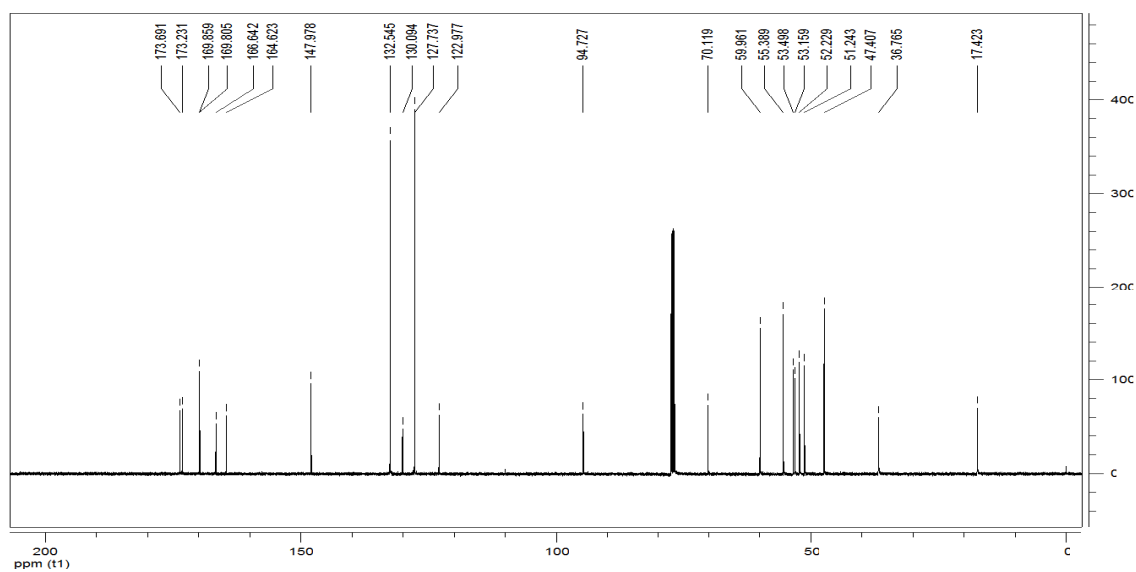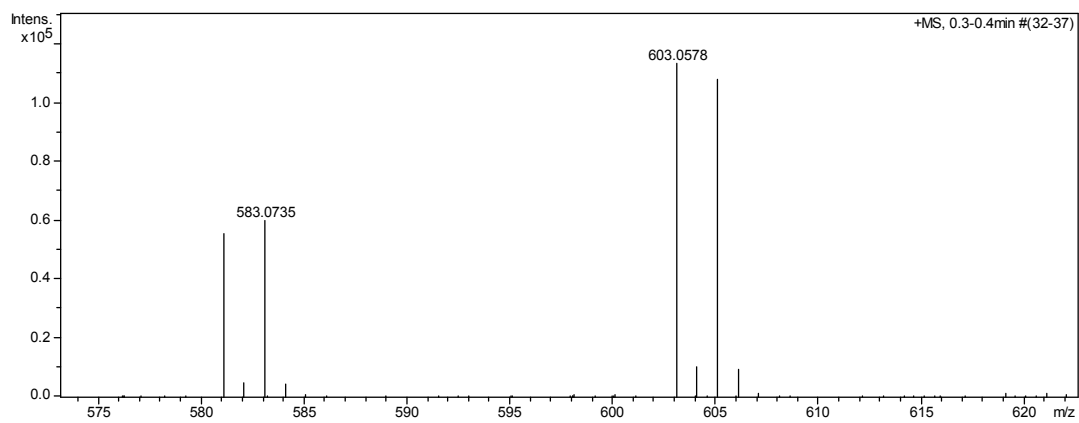

**Diethyl 2-(1-(2-ethoxy-2-oxoethyl)-1-(ethoxycarbonyl)-3-methyl-4,6-dioxo-5-phenyl-hexahydropyrrolo[3,4-c]pyrrol-2(1H)-yl)maleate (4i):**

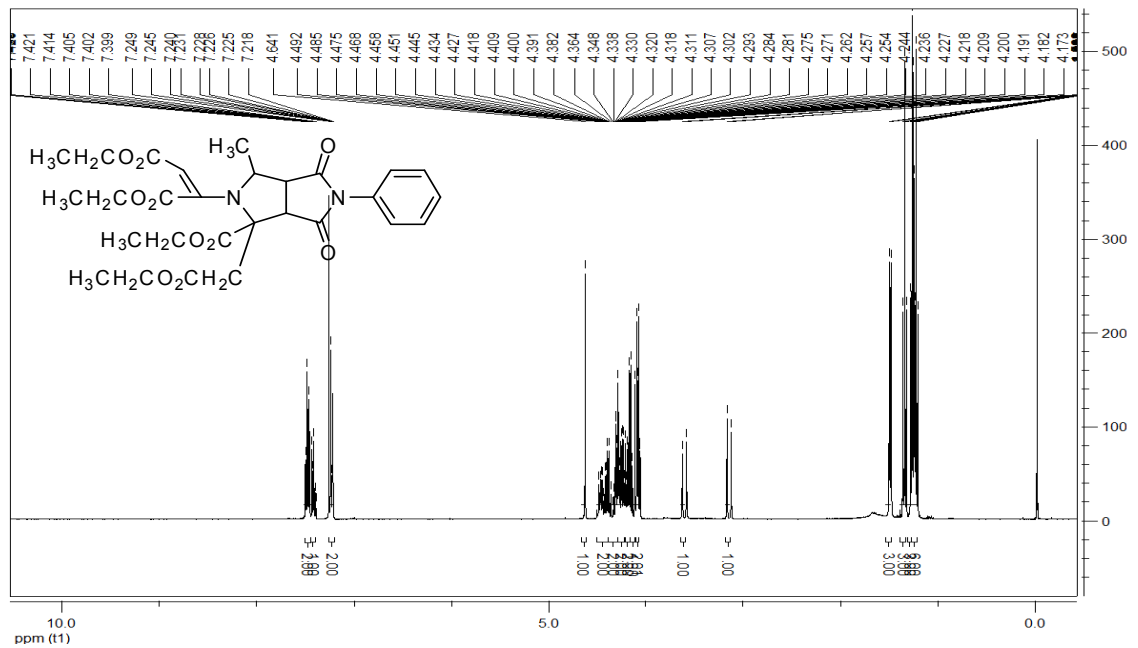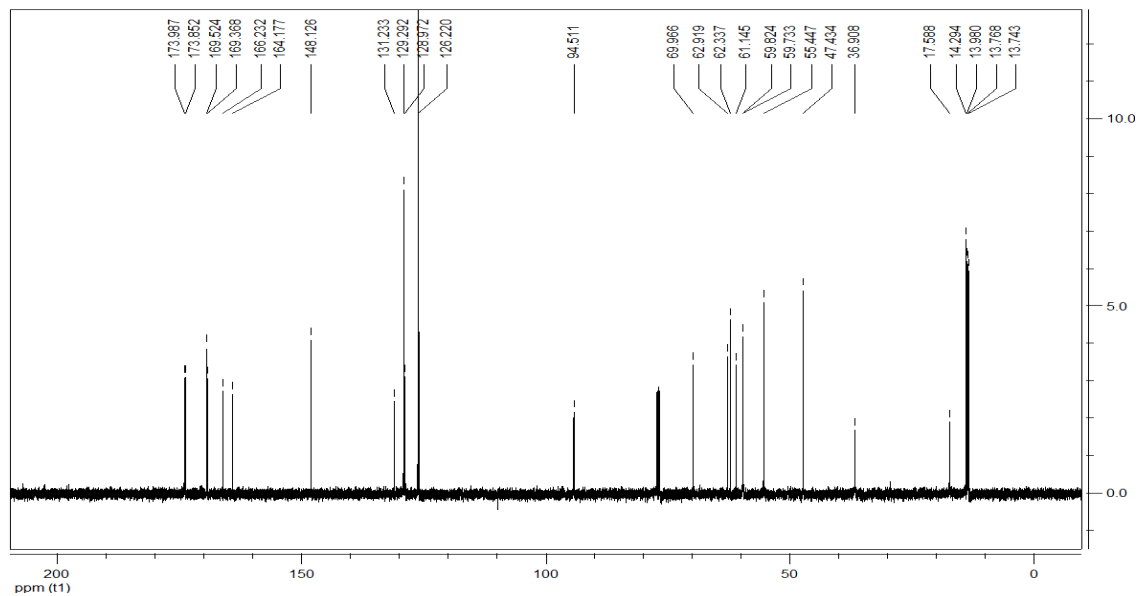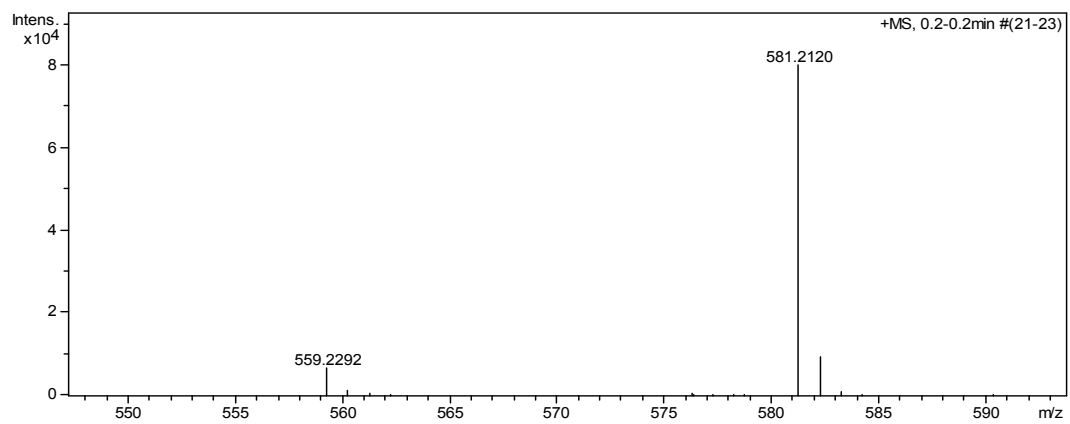



**Dimethyl 2-(3-benzyl-1-(2-methoxy-2-oxoethyl)-1-(methoxycarbonyl)-4,6-dioxohexahydro-pyrrolo[3,4-c]pyrrol-2(1H)-yl)maleate (4j):**

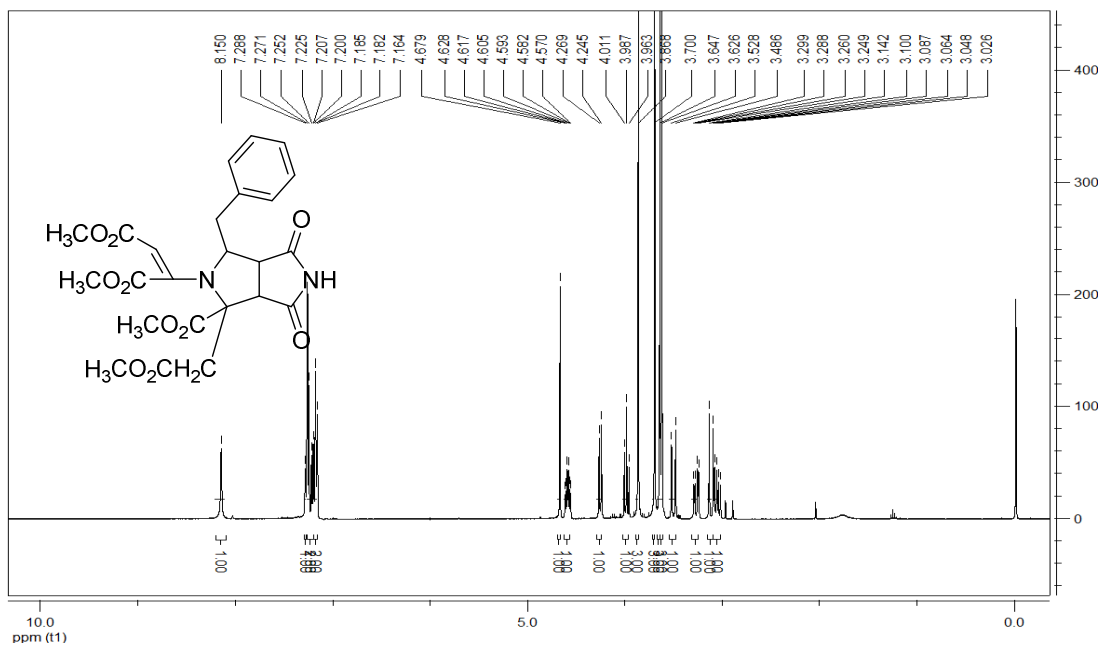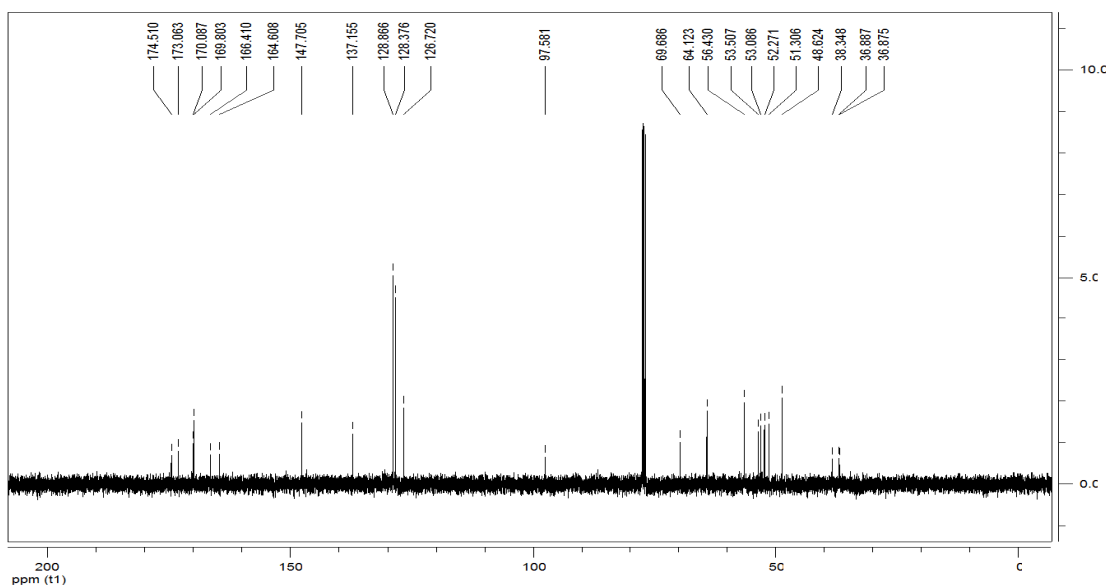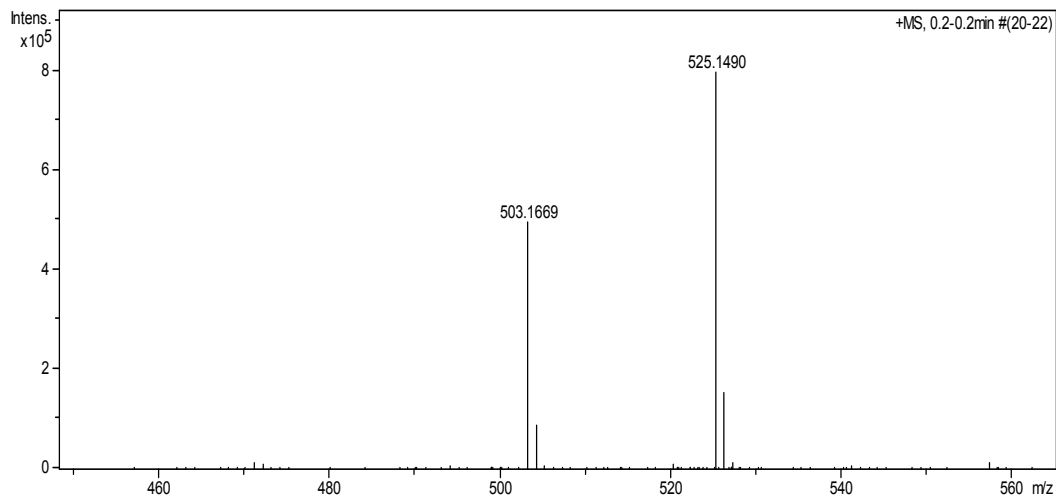

**Dimethyl 2-(3-benzyl-1-(2-methoxy-2-oxoethyl)-1-(methoxycarbonyl)-4,6-dioxo-5-phenylp  
hexahydropyrrolo[3,4-c]pyrrol-2(1H)-yl)maleate (4k):**

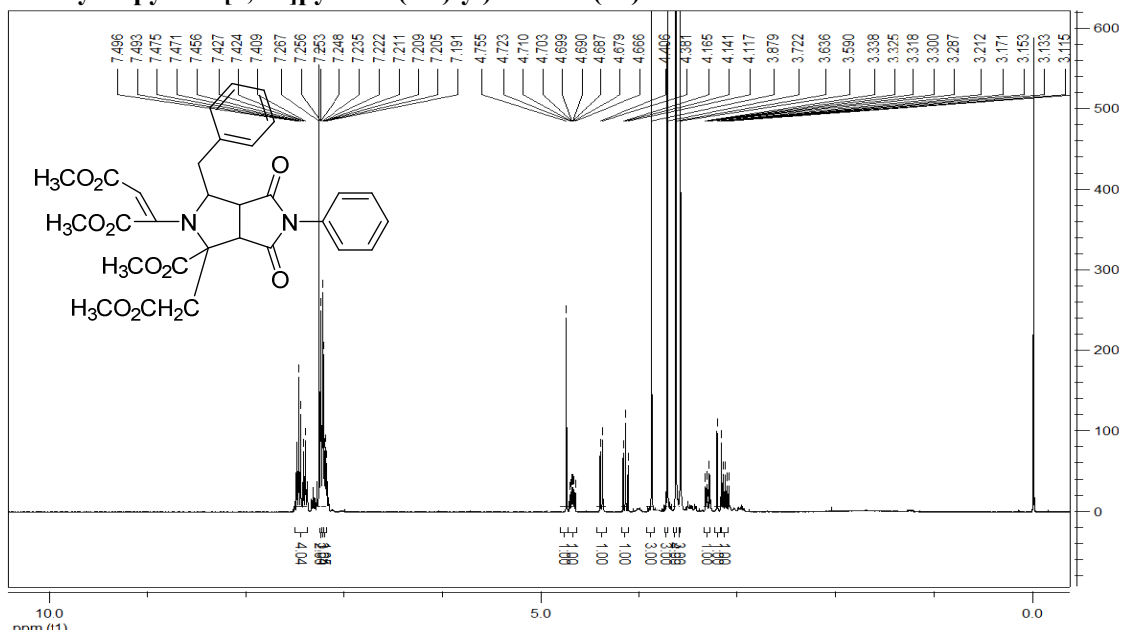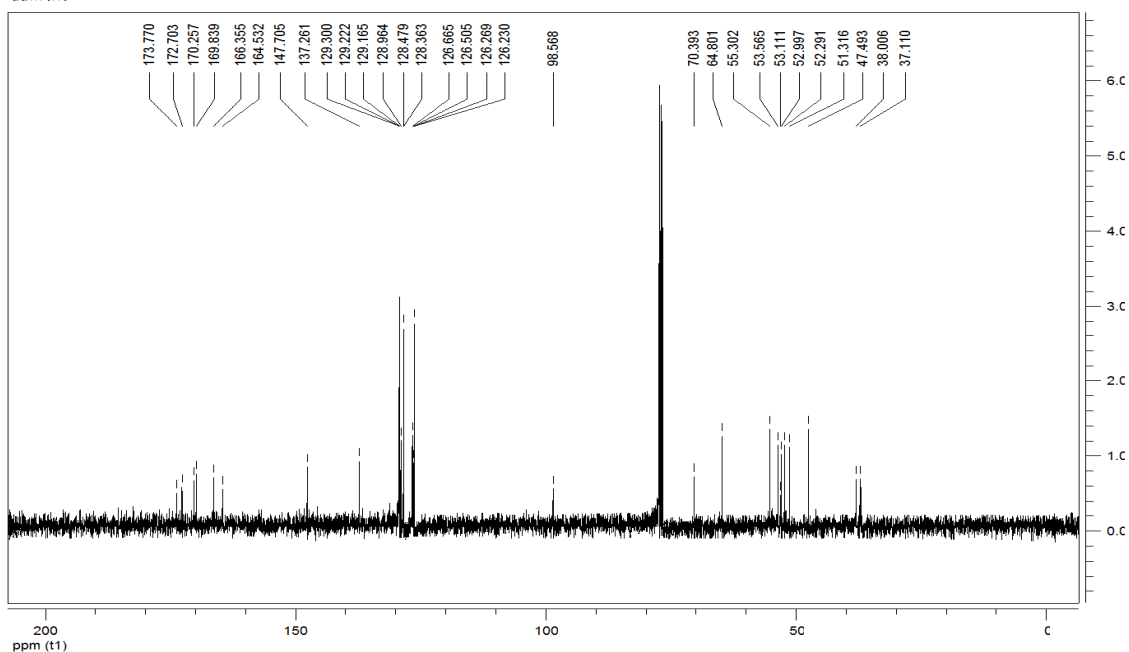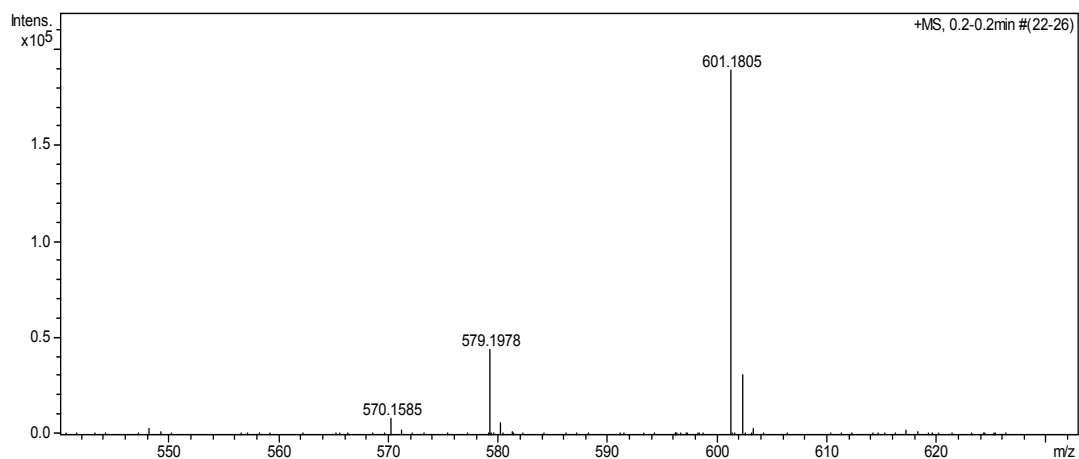

**Diethyl 2-(3-benzyl-1-(2-ethoxy-2-oxoethyl)-1-(ethoxycarbonyl)-5-methyl-4,6-dioxohexahydropyrrolo[3,4-c]pyrrol-2(1H)-yl)maleate (4l):**

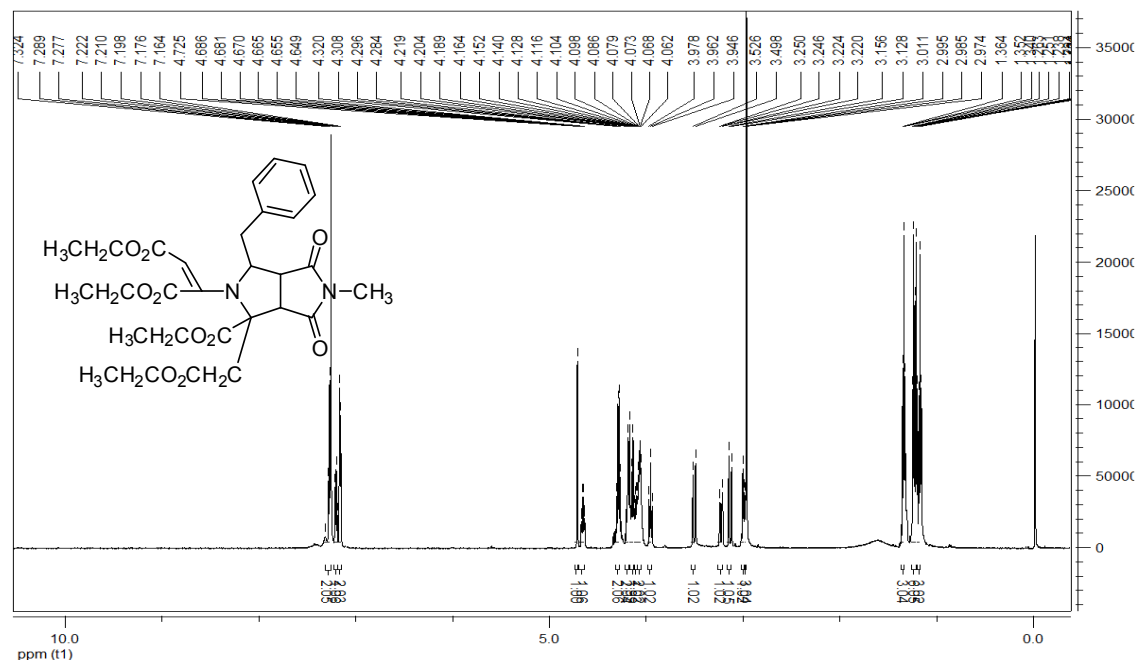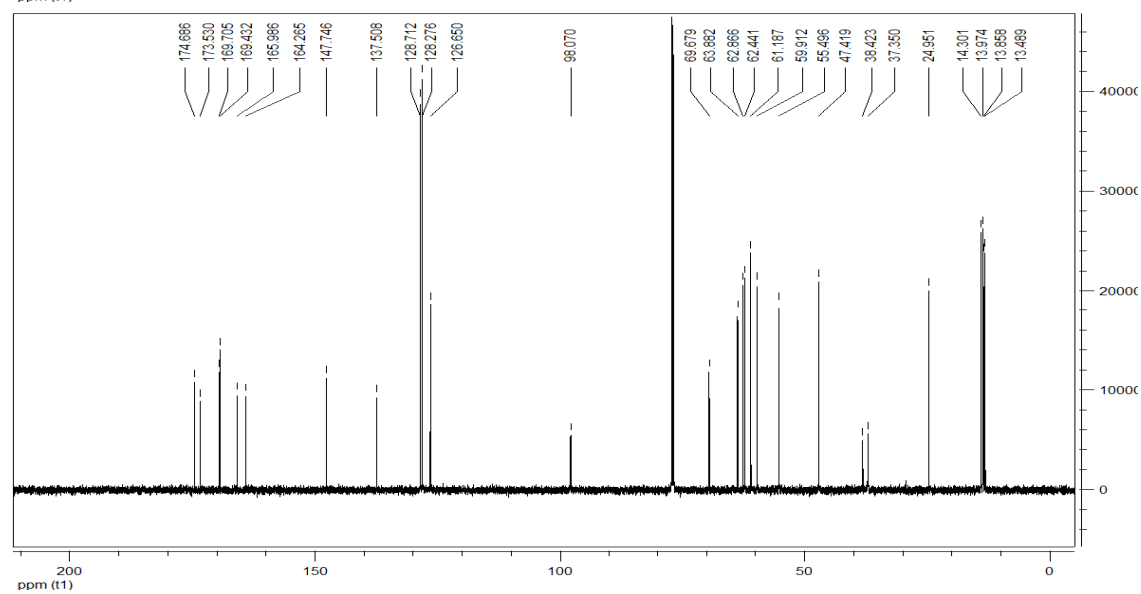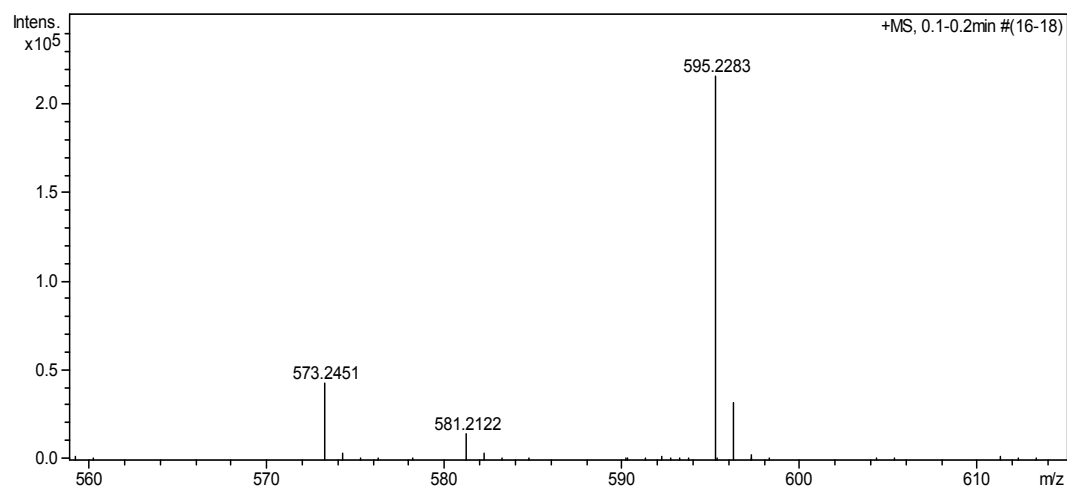

**Dimethyl 2-(3-isobutyl-1-(2-methoxy-2-oxoethyl)-1-(methoxycarbonyl)-5-methyl-4,6-dioxohexahydropyrrolo[3,4-c]pyrrol-2(1H)-yl)maleate (4m):**

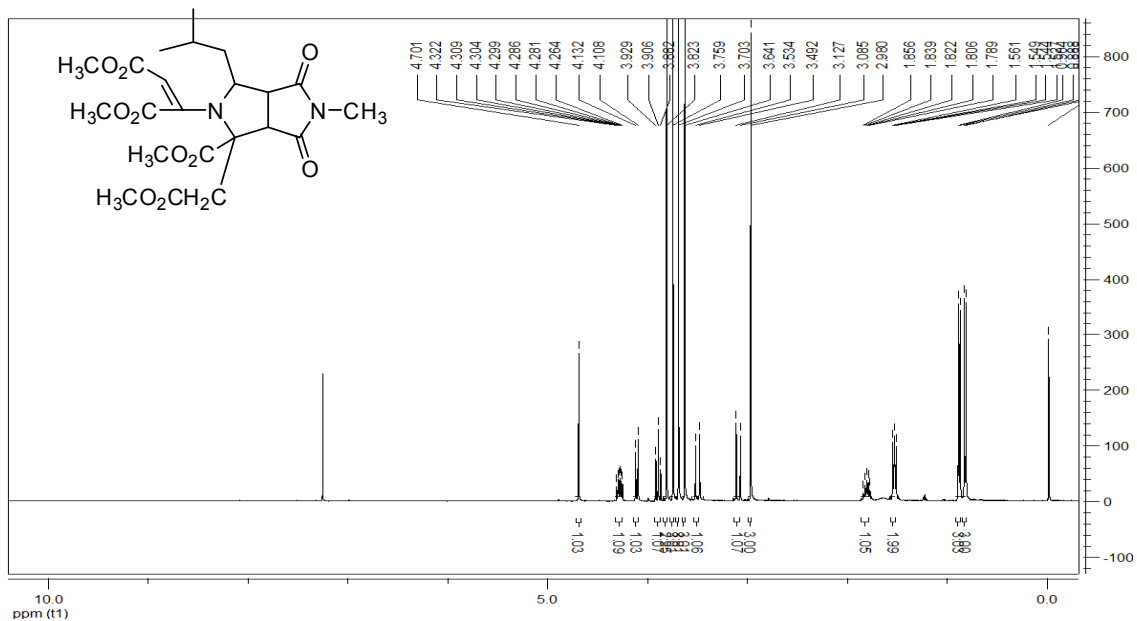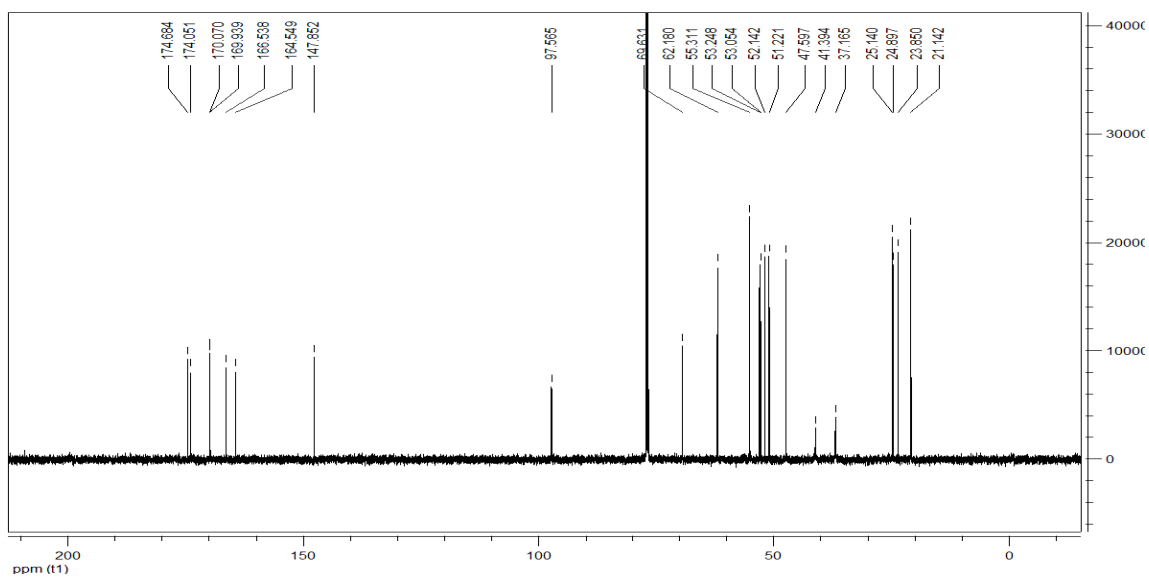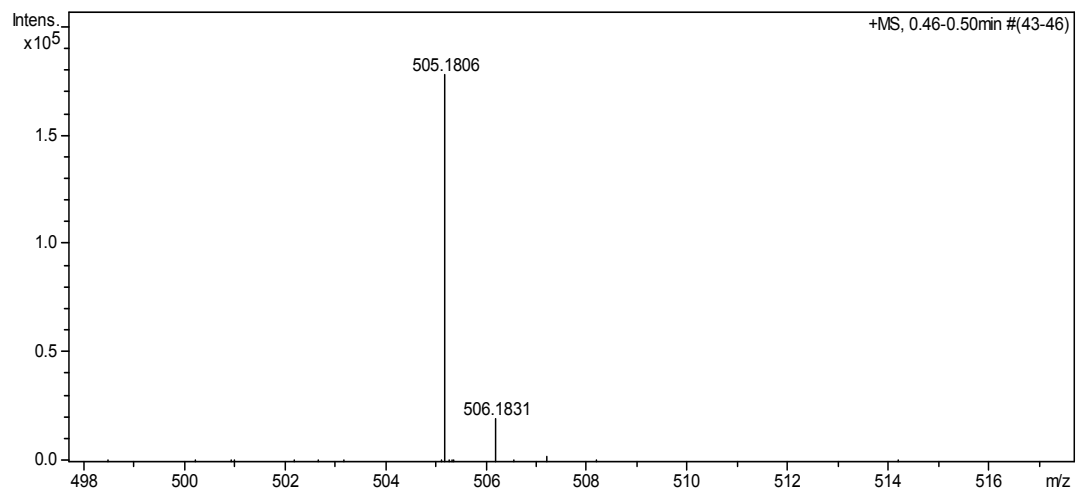

**Dimethyl 2-(5-(4-bromophenyl)-3-isobutyl-1-(2-methoxy-2-oxoethyl)-1-(methoxycarbonyl)-4,6-dioxohexahydropyrrolo[3,4-c]pyrrol-2(1H)-yl)maleate (4n):**

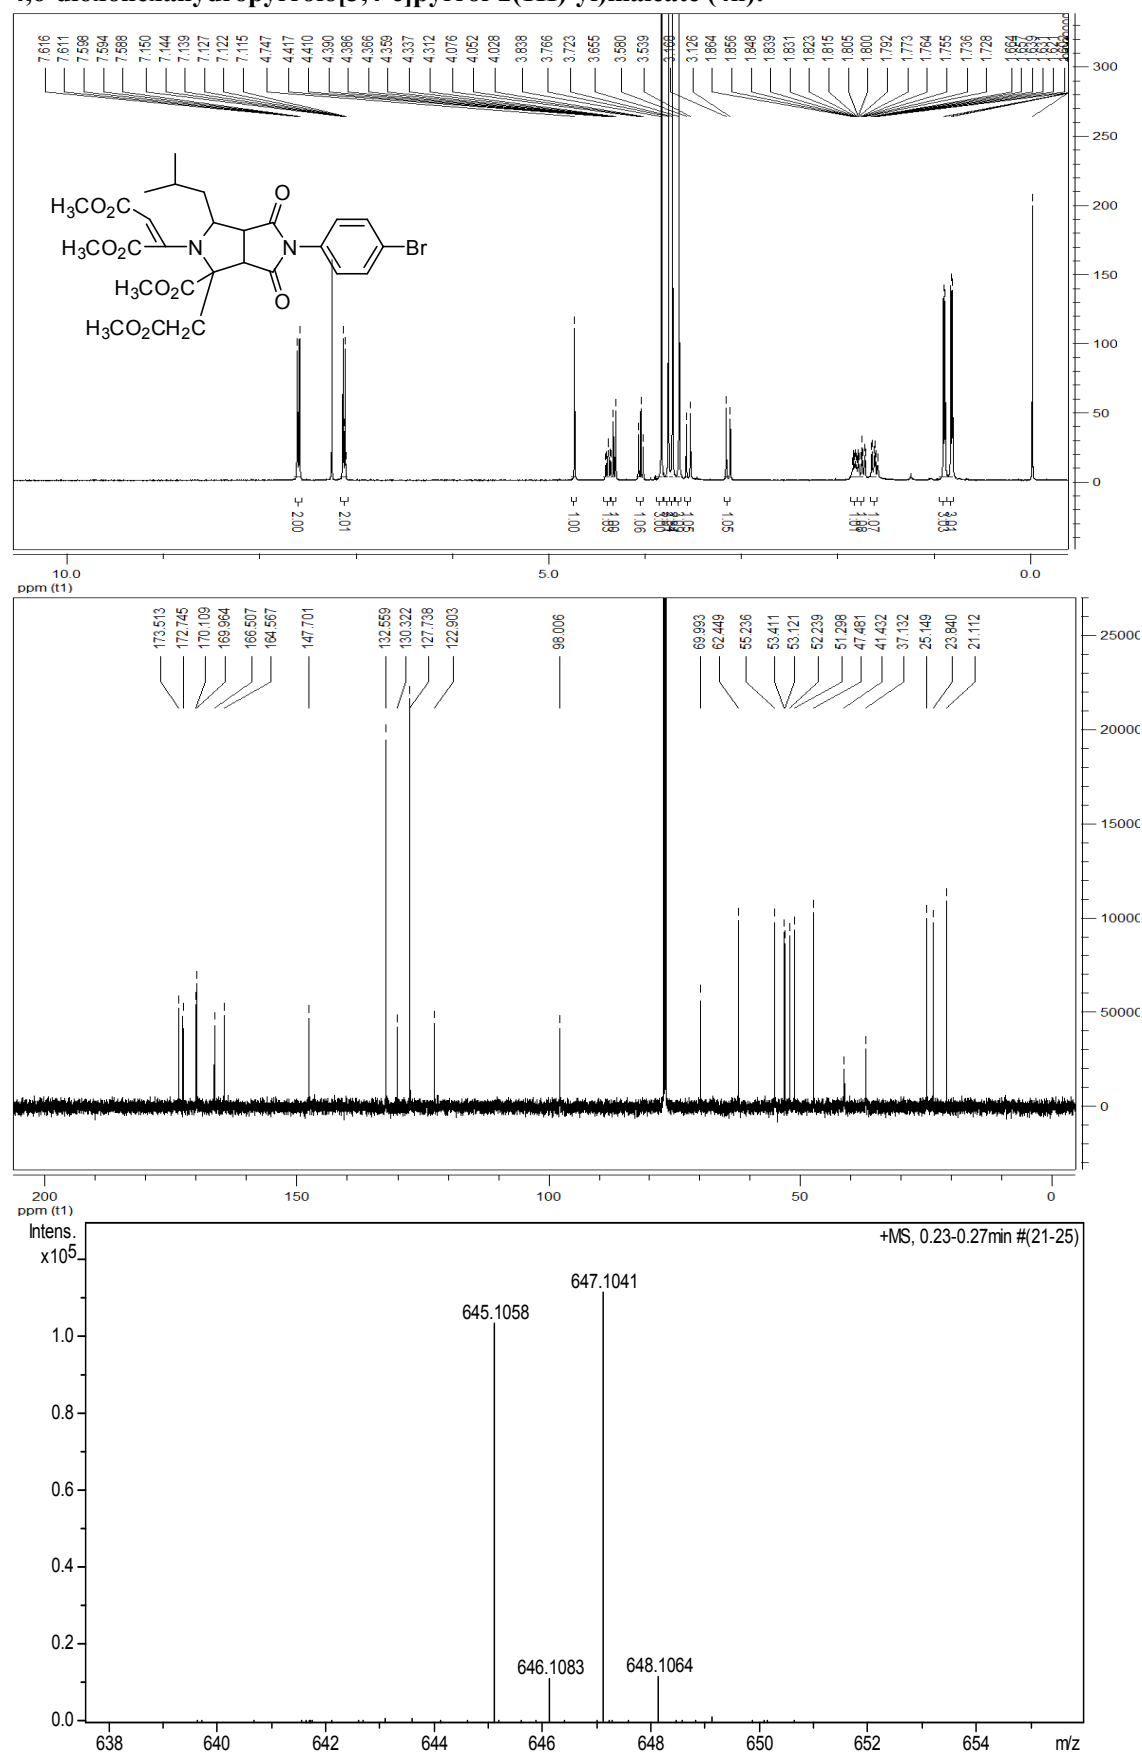

**Methyl 1-(2-methoxy-2-oxoethyl)-2,5-dimethyl-4,6-dioxo-octahydropyrrolo[3,4-c]pyrrole-1-carboxylate (5a):**

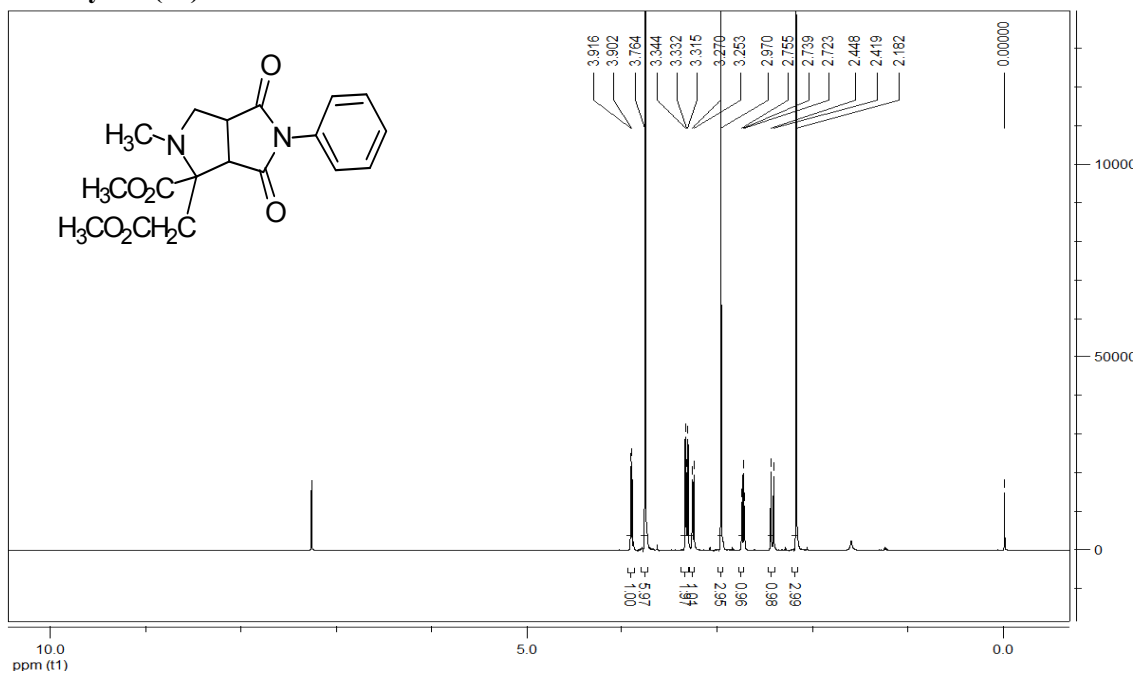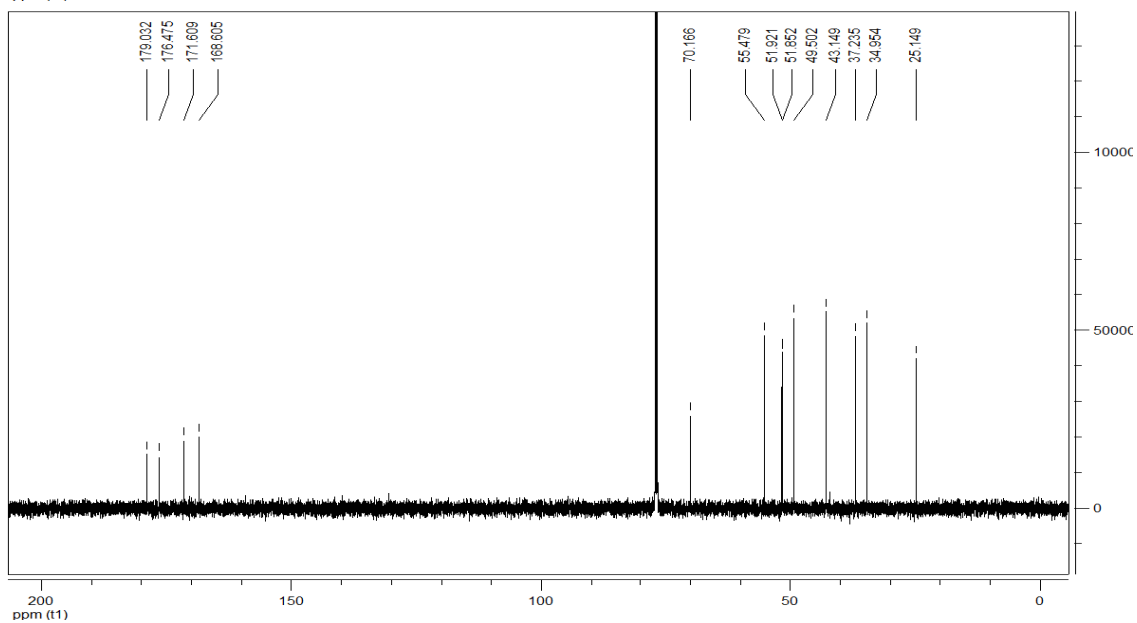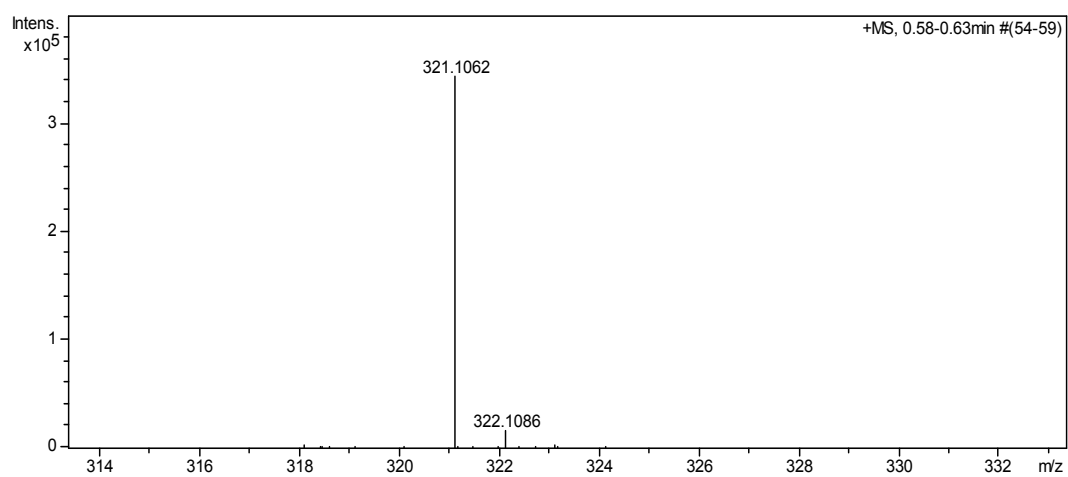

**Methyl 1-(2-methoxy-2-oxoethyl)-2-methyl-4,6-dioxo-5-phenyloctahydropyrrolo[3,4-c]-pyrrole-1-carboxylate (5b):**

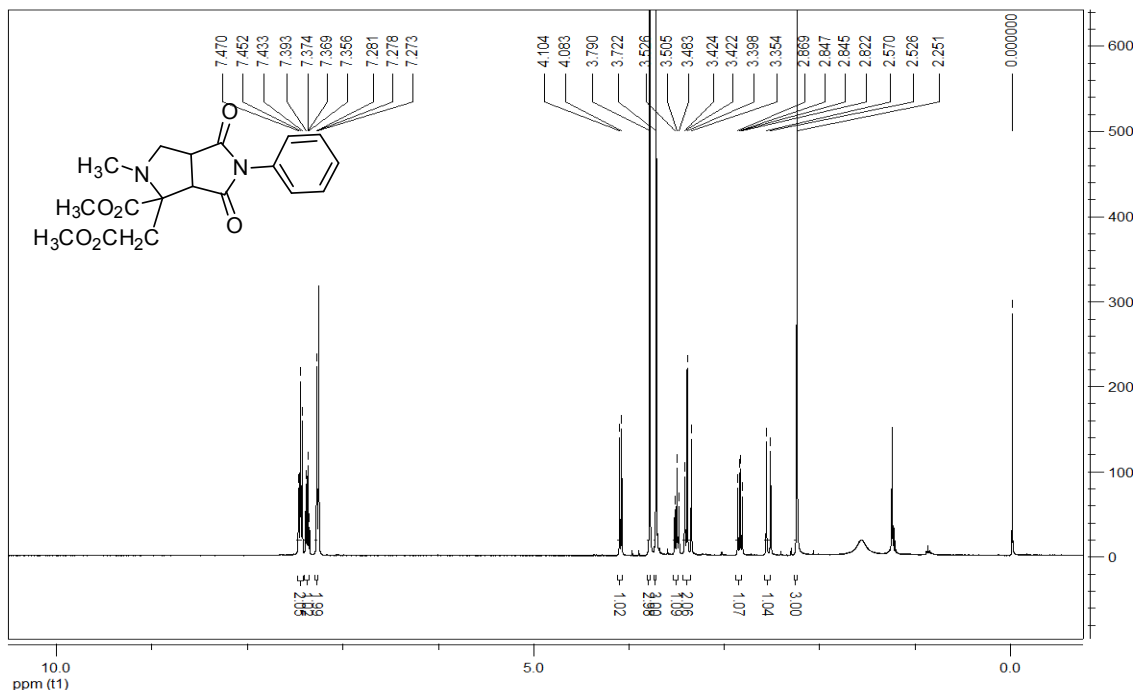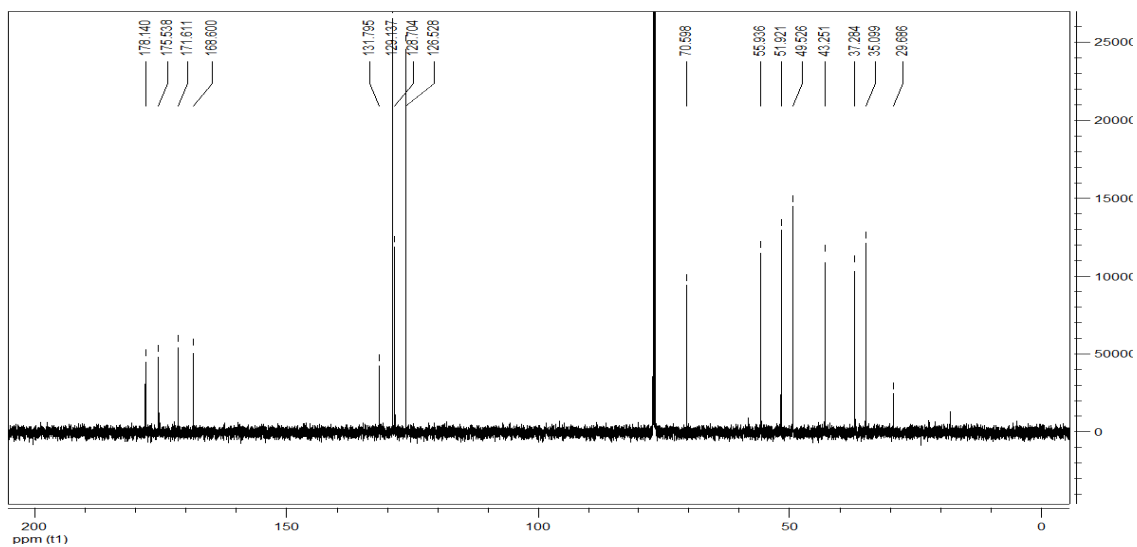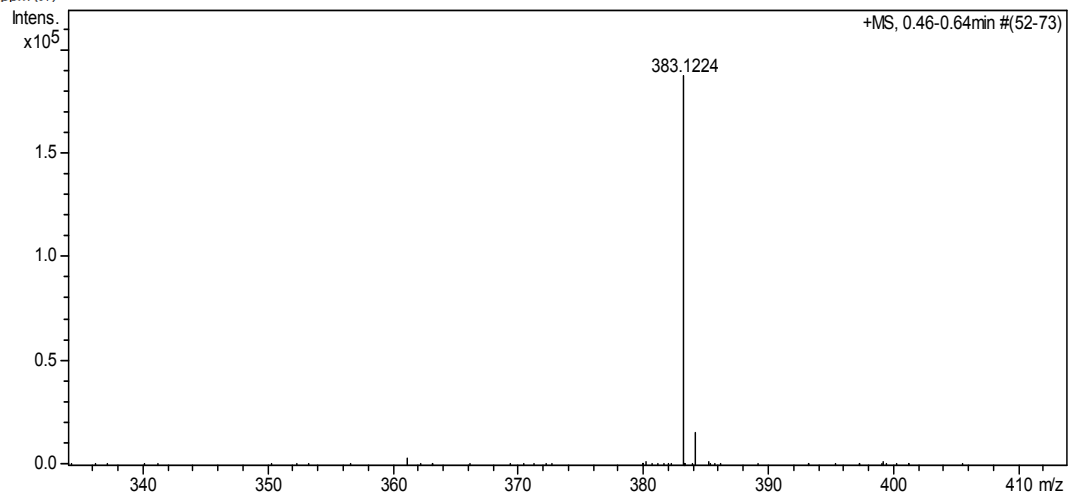

**Methyl 5-(4-bromophenyl)-1-(2-methoxy-2-oxoethyl)-2-methyl-4,6-dioxooctahydropyrrolo-[3,4-c]pyrrole-1-carboxylate (5c):**

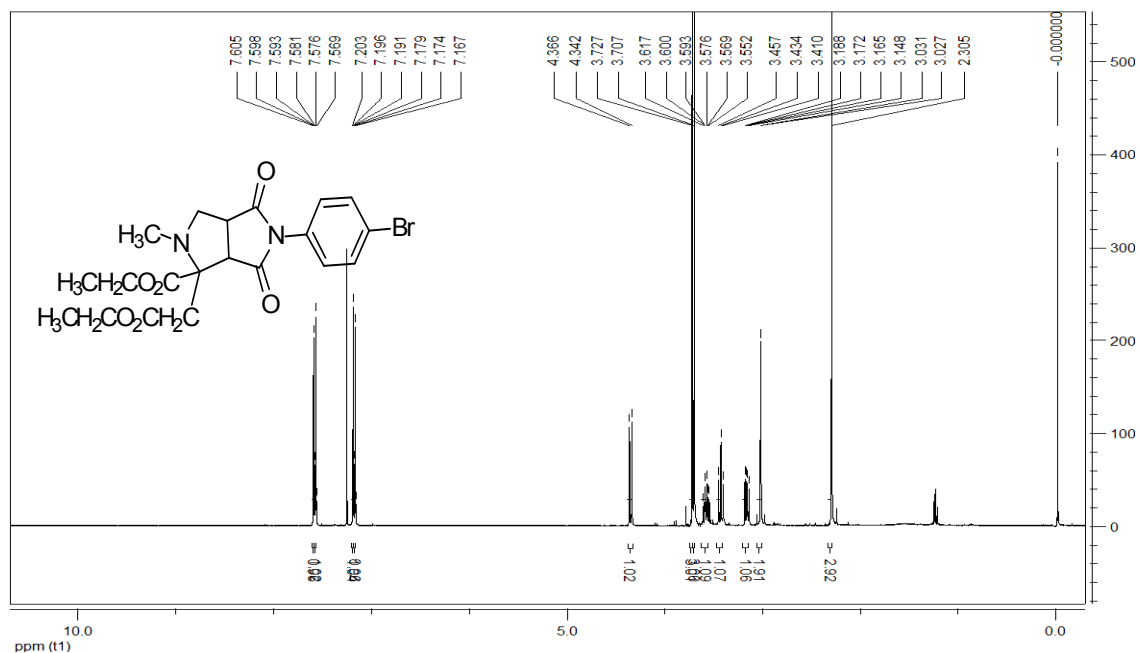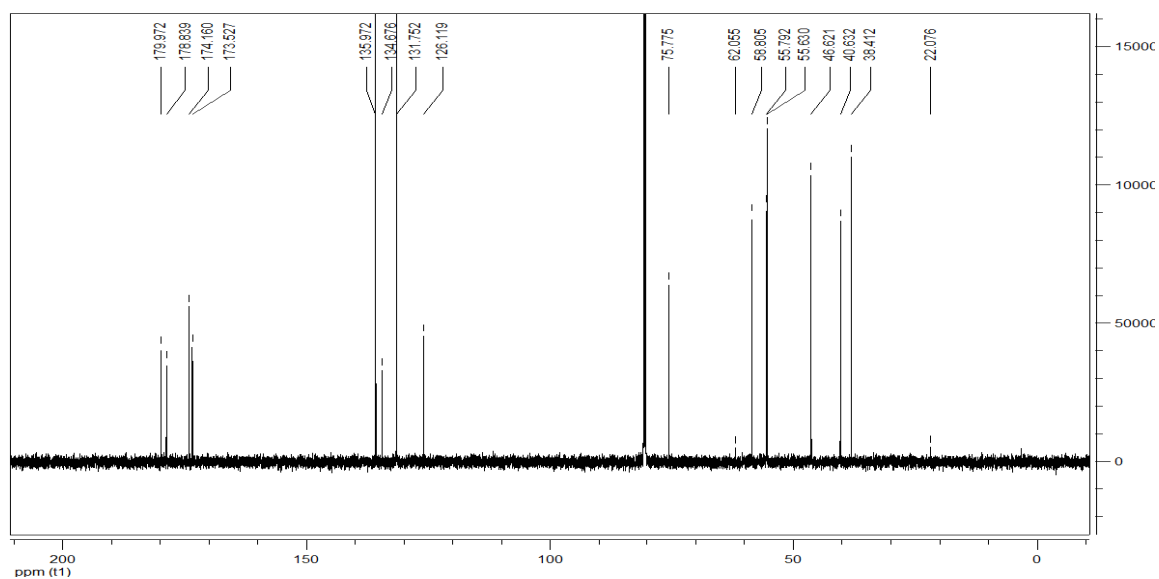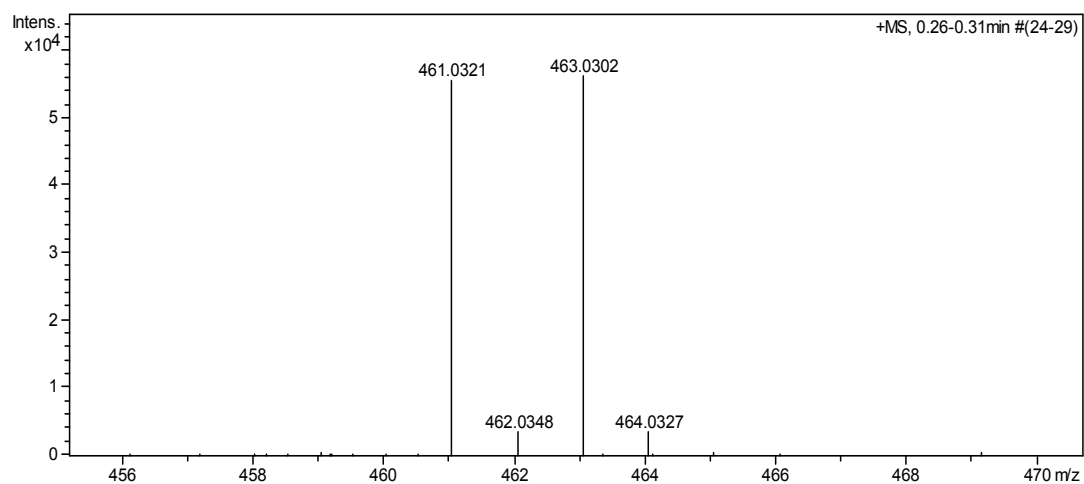



methyl

**5-(4-bromophenyl)-1-(2-methoxy-2-oxoethyl)-2-methyl-4,6-dioxooctahydropyrrolo[3,4-c]pyrrole-1-carboxylate (5c')**

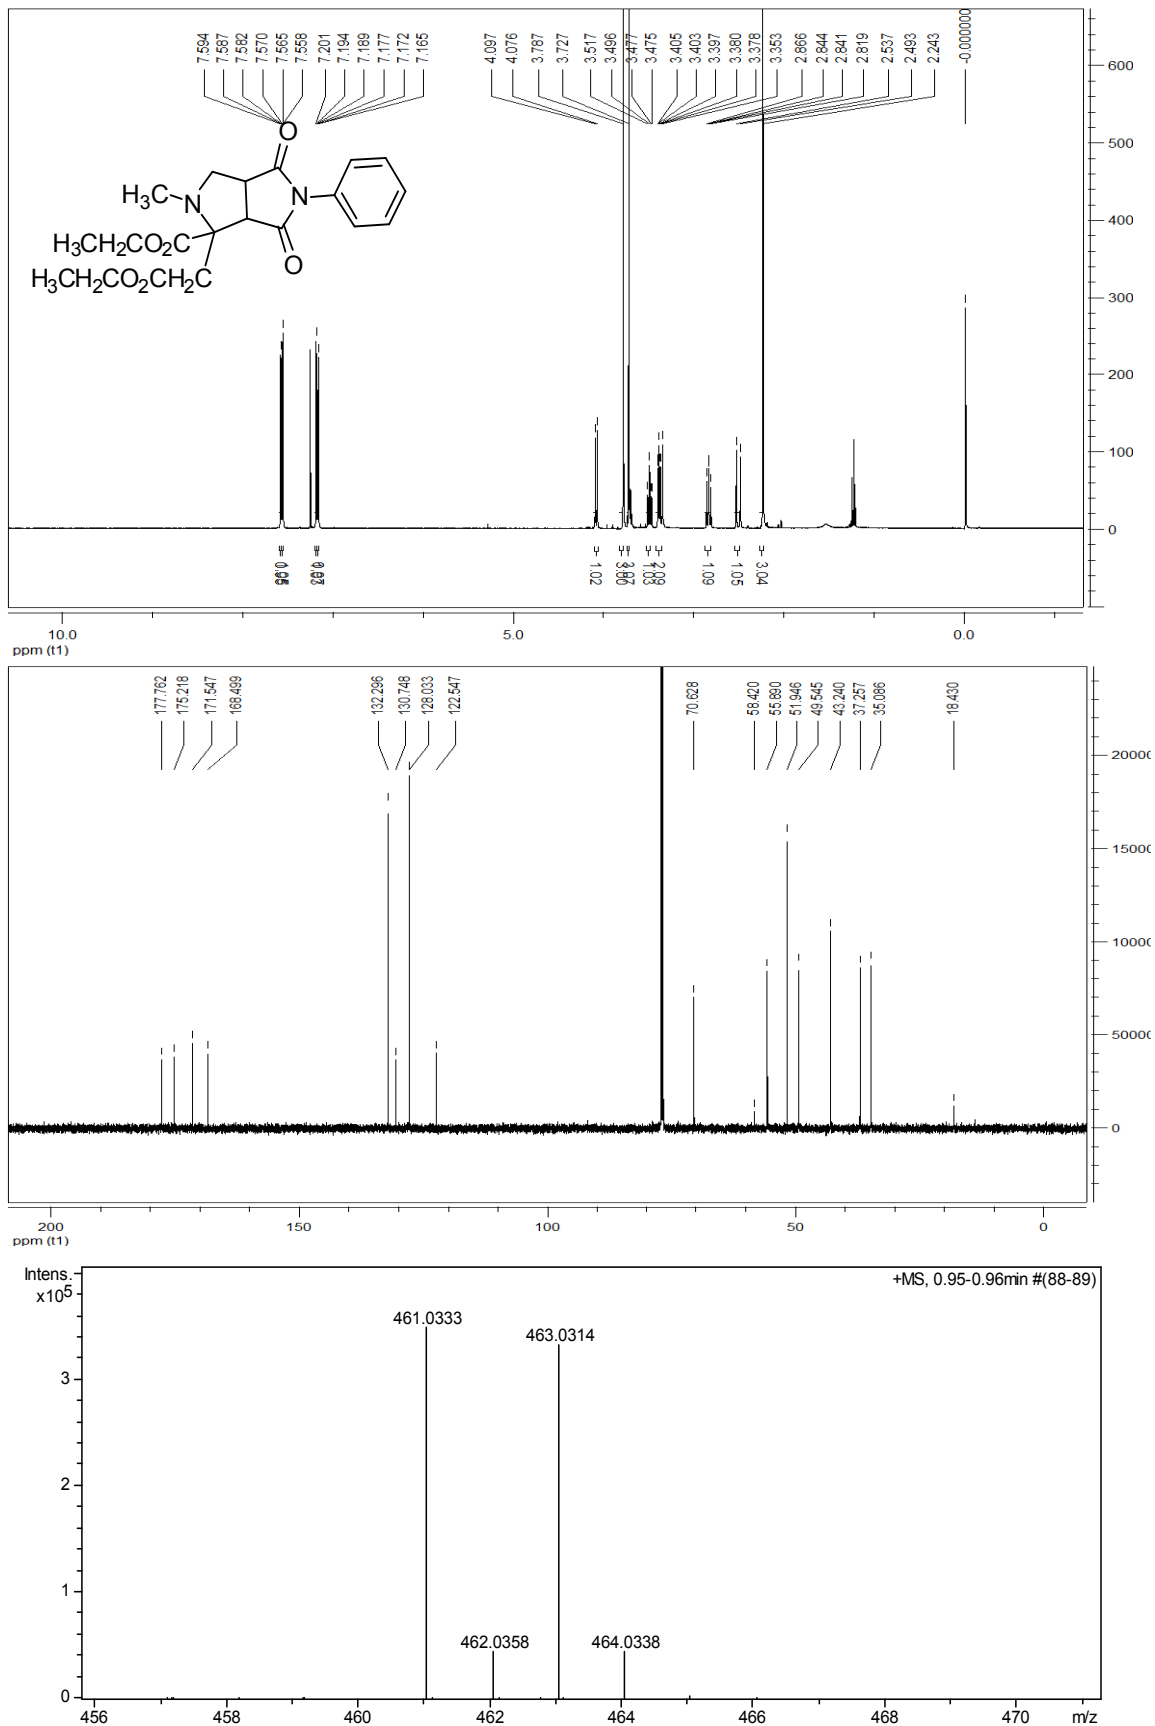

**Ethyl 1-(2-ethoxy-2-oxoethyl)-2-methyl-4,6-dioxo-5-phenyloctahydropyrrolo[3,4-c]-pyrrole-1-carboxylate (5d):**

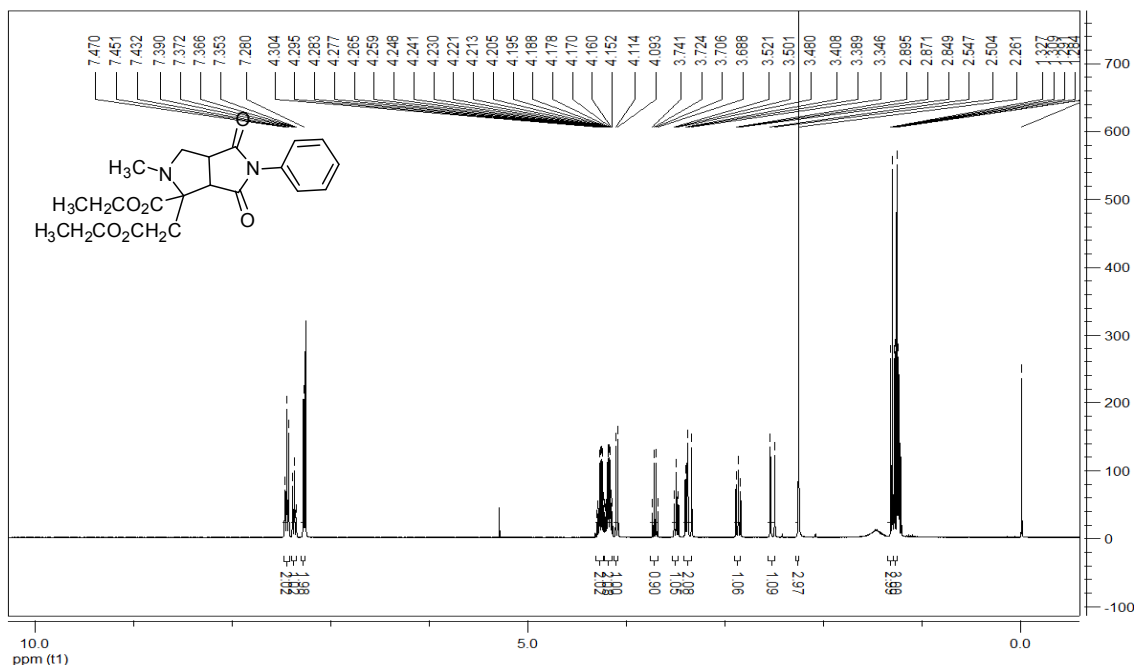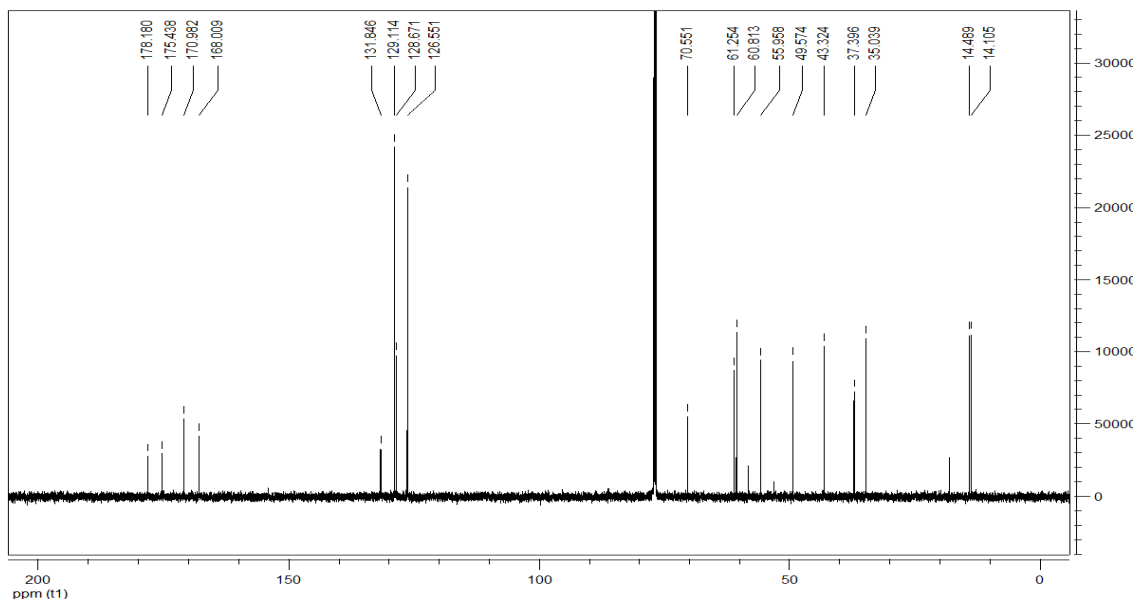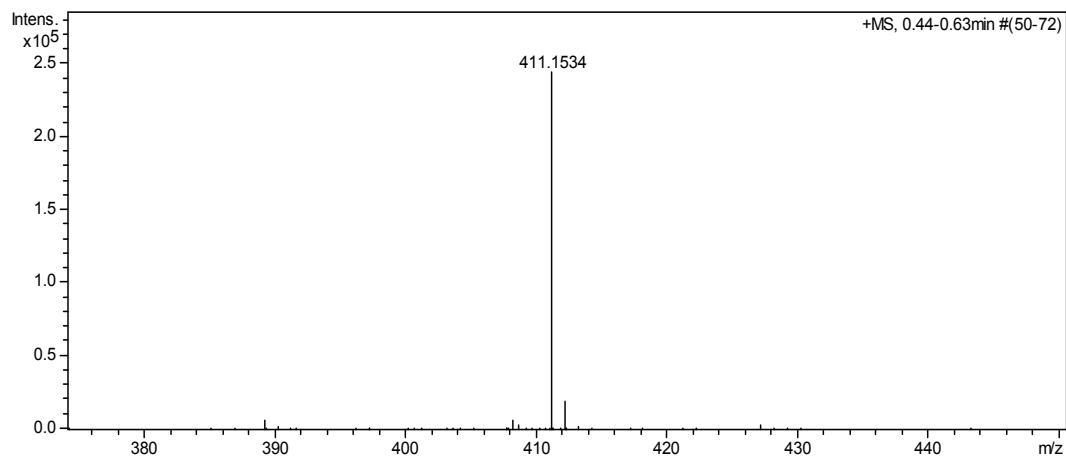

**Ethyl 5-(4-bromophenyl)-1-(2-ethoxy-2-oxoethyl)-2-methyl-4,6-dioxooctahydropyrrolo-[3,4-c]-pyrrole-1-carboxylate (5e):**

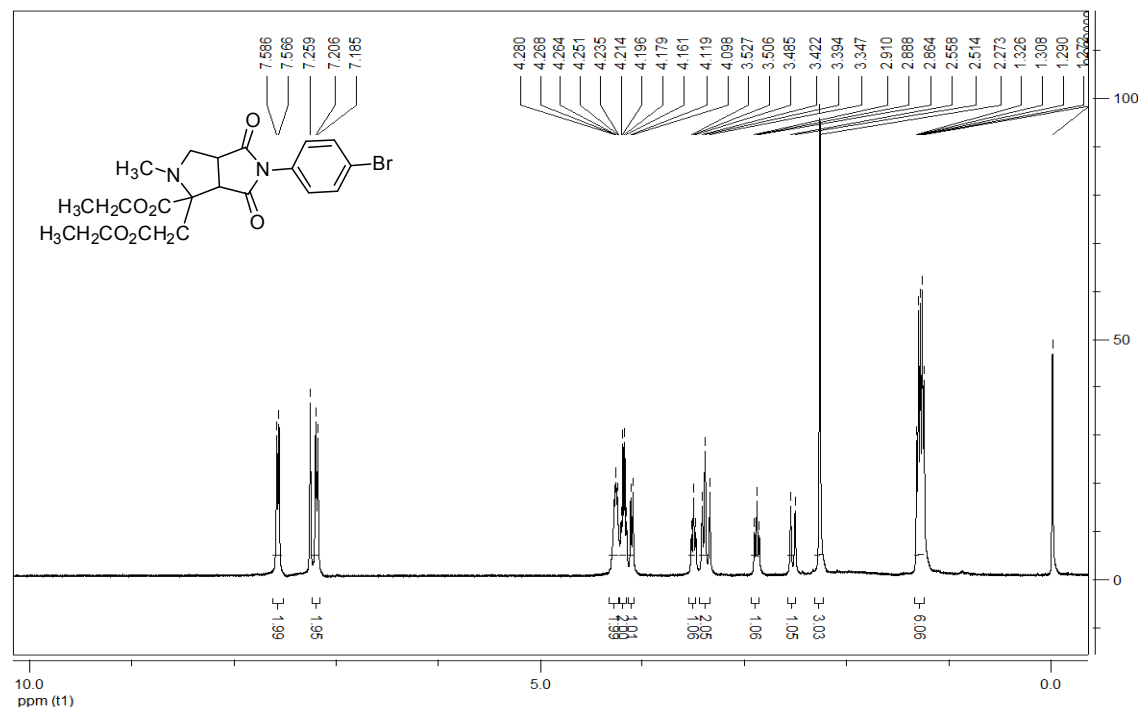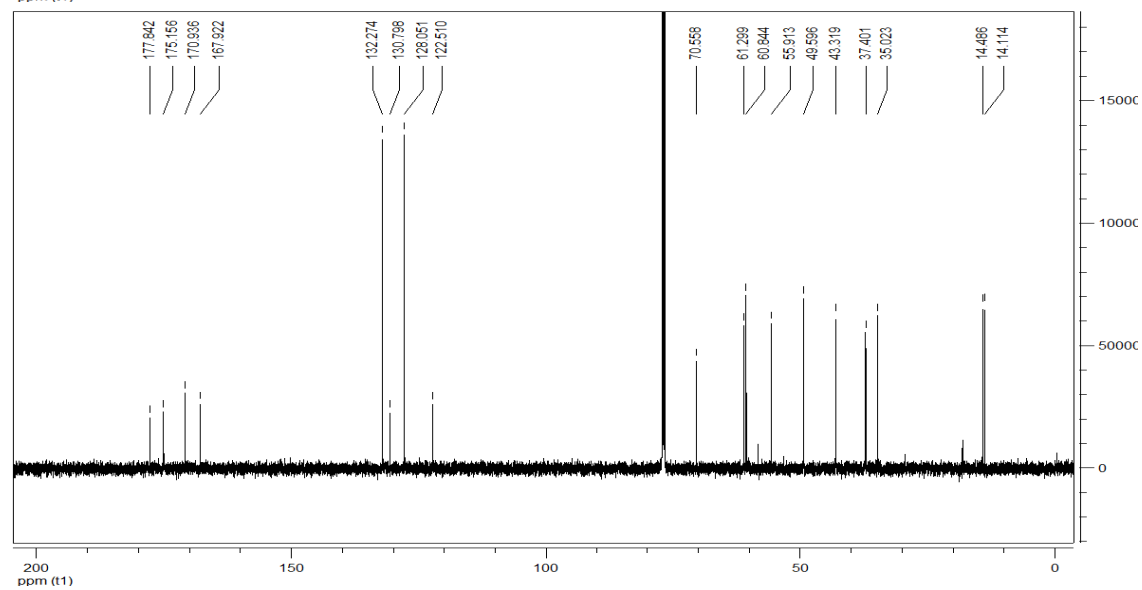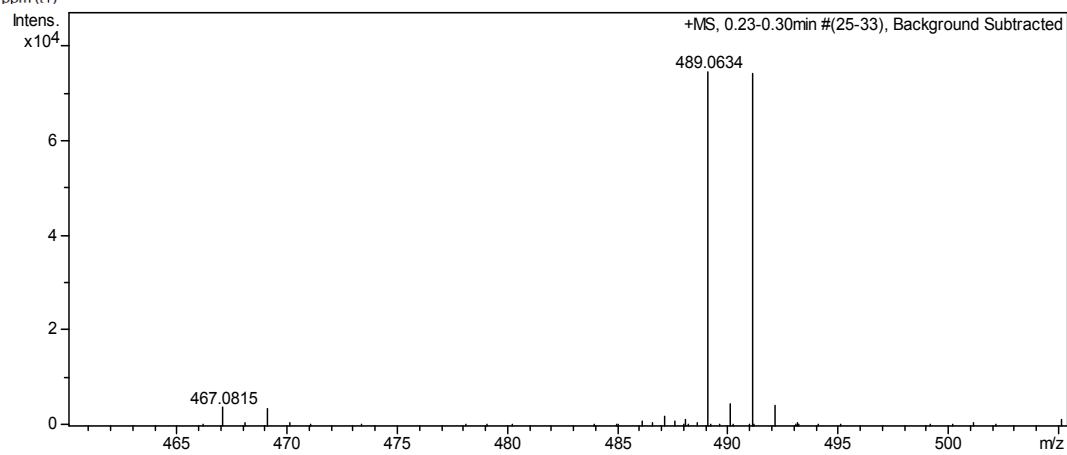

Supplement: c6ob00921b1.pdf [file c6ob00921b1.pdf]
